# Mismatch repair disturbs meiotic class I crossover control

Tim J. Cooper<sup>1</sup>, Margaret R. Crawford<sup>1</sup>, Laura J. Hunt<sup>1</sup>, Marie-Claude Marsolier-Kergoat<sup>2</sup>, Bertrand Llorente<sup>3</sup> and \*Matthew J. Neale<sup>1</sup>.

1. *Genome Damage and Stability Centre, School of Life Sciences, University of Sussex, UK*

2. *CEA/DRF, I2BC/UMR 9198, SBIGeM, Gif-sur-Yvette, France; CNRS-UMR 7026, Éco-anthropologie et Ethnobiologie, Musée de l'Homme, 17, Place du Trocadéro et du 11 Novembre, Paris, France.*

3. *Cancer Research Centre of Marseille, CNRS UMR7258, INSERM U1068, Institut Paoli-Calmettes, Aix-Marseille Université UM105, Marseille, France.*

## Summary

Sequence divergence, mediated by the anti-recombinogenic activity of mismatch repair (MMR), forms a barrier to meiotic recombination and in turn the formation of viable gametes. However, rather than MMR acting as a non-specific impediment to meiotic recombination, here we provide evidence that at regions of greater sequence divergence MMR preferentially suppresses interfering (class I) crossovers (COs). Specifically, as measured in two *Saccharomyces cerevisiae* hybrids containing thousands of DNA-sequence polymorphisms, removal of MMR components increases both the frequency of CO formation and the uniformity of the observed CO distribution. At fine scale, CO positions are skewed away from polymorphic regions in MMR-proficient cells, but, critically, not when members of the class I CO pathway, *MSH4* or *ZIP3*, are inactivated. These findings suggest that class I COs are more sensitive to heteroduplex DNA arising during recombination. Simulations and analysis of Zip3 foci on meiotic chromosomes support roles for Msh2 both early and late in the class I CO maturation process. Collectively, our observations highlight an unexpected interaction between DNA sequence divergence, MMR, and meiotic class I CO control, thereby intimately linking the regulation of CO numbers and their distribution to pathways contributing to reproductive isolation and eventual speciation.

## Introduction

Meiosis, a specialised two-step nuclear division, is responsible for the generation of genetically diverse, haploid gametes. An integral feature of the meiotic program is the initiation of homologous recombination via programmed Spo11-dependent DNA double-strand break (DSB) formation (Lam and Keeney, 2015). Subsequent steps of DSB repair leads to the formation of reciprocal, interhomologue exchanges known as

33 crossovers (COs)—visualised cytologically as chiasmata—that are essential for faithful disjunction of meiotic  
34 chromosomes during anaphase I (Gray and Cohen, 2016; Berchowitz and Copenhagen, 2010). Failure to form  
35 at least one CO per homologue pair risks the formation of aneuploid gametes, and thus the process of CO  
36 formation is highly regulated (Shinohara et al., 2008; Martini et al., 2006). Importantly, many DSBs—in some  
37 organisms the bulk of recombination events—repair without reciprocal exchange and are termed non-  
38 crossovers (Storlazzi et al., 1995; Baudat and de Massy, 2007a; Li et al., 2019).

39  
40 Within many organisms, including *Saccharomyces cerevisiae* (the subject of this study), *Mus musculus*, *Homo*  
41 *sapiens* and *Arabidopsis thaliana*, two subclasses of CO co-exist. ZMM (Zip2-Zip3-Zip4-Spo16, Mlh1-Mlh3,  
42 Msh4-Msh5, Mer3)-dependent class I COs account for the majority of COs formed (~70-85% within *S.*  
43 *cerevisiae* (Lynn et al., 2007; de los Santos et al., 2003)). Class I COs are distributed more evenly along each  
44 chromosome than expected by chance via a process referred to as CO interference in which the formation of  
45 COs in proximity to one another appears suppressed (Berchowitz and Copenhagen, 2010). Class I CO  
46 formation requires the nuclease activity of Mlh1-Mlh3, a heterodimer otherwise involved in MMR (Zakharyevich  
47 et al., 2012; Cannavo et al., 2020; Kulkarni et al., 2020; Pannafino and Alani, 2021). The less abundant class  
48 II COs are non-interfering and depend upon the Mus81-Mms4, Yen1, or Slx1-Slx4 structure-specific nucleases  
49 (Holloway et al., 2008; de los Santos et al., 2003; Matos et al., 2011; Sarbajna et al., 2014).

50  
51 Current models of class I CO formation suggest at least a two-step process involving, initially, the designation  
52 of a subset of precursor DSB intermediates by pro-class I CO factors (Bishop and Zickler, 2004). Although CO  
53 interference is proposed to become active at this stage, thereby shaping the distribution of COs along  
54 chromosomes, the final distribution of class I events is secondarily impacted by a later process: class I CO  
55 maturation (Zhang et al., 2014a). Rates of maturation less than 100% will specifically deplete class I COs.  
56 Such depletion can lead to achiasmatic chromosomes, or chromosomes with a residual CO positioned close  
57 to one or other telomere, where they are considered an “at-risk” location for successful segregation (Wang et  
58 al., 2017). Such ideas have been developed to help explain the relatively high rate of meiotic chromosome  
59 missegregation in human females relative to males (Wang et al., 2017).

60  
61 Homologous recombination, the process responsible for both CO and NCO formation, requires a repair  
62 template with near-perfect sequence identity (Harfe and Jinks-Robertson, 2000). Mechanistically, Msh2, an  
63 essential MMR protein and orthologue of bacterial MutS (Reenan and Kolodner, 1992), is key in binding  
64 mismatches to promote their repair through the endonucleolytic action of the Mlh1-Pms1 and Mlh1-Mlh3

65 complexes (Kolodner and Marsischky, 1999; Srivatsan et al., 2014). Such mismatch detection by Msh2 is  
66 thereby integral to preventing recombination by mechanisms that include recruitment of the anti-recombination  
67 helicase Sgs1 to heteroduplex DNA (Goldfarb and Alani, 2005). As such, in MMR-proficient *S. cerevisiae*  
68 hybrids, recombination between polymorphic homoeologous substrates is inefficient, leading to reduced rates  
69 of meiotic CO formation, reduced spore viability, and increased chromosomal non-disjunction during meiosis  
70 I (Chambers et al., 1996; Hunter et al., 1996)—phenotypes linked to incipient speciation, and which are largely  
71 reversed within MMR-deficient strains (Greig et al., 2003; Hunter et al., 1996; Martini et al., 2011; Chambers  
72 et al., 1996; Spies and Fishel, 2015; Bozdogan et al., 2021). However, whilst Msh2-dependent binding to  
73 mismatches it likely to be rapid (Zhai and Hingorani, 2010), the precise stage of the HR pathway(s) that  
74 mismatch recognition arises, and whether this is the same for all intermediates, and in all organisms, is unclear.  
75 Indeed, recent observations in mouse meiosis suggest only limited impact of MMR activity on recombination  
76 suppression (Peterson et al., 2020), and perhaps more intriguingly, observations in *Arabidopsis thaliana*  
77 indicate an unexpected association (rather than inhibition) of recombination within polymorphic regions  
78 (Blackwell et al., 2020). Given the fundamental intimate relationships between MMR, sequence divergence,  
79 and meiotic recombination, such observations highlight the need to thoroughly explore, and to understand  
80 better, the impacts that meiotic MMR activity may have across biology.

81

## 82 **Results**

### 83 **Deletion of *MSH2* alters the genome-wide frequency and distribution of meiotic crossovers**

84 In order to investigate the impact sequence divergence and the process of mismatch repair has upon meiotic  
85 CO formation in the budding yeast, *S. cerevisiae*, we mapped recombination patterns genome-wide (**Fig. 1a**  
86 and **Methods**) within six wild-type and thirteen MMR-defective *msh2Δ* meioses—obtained from a hybrid of two  
87 widely utilized laboratory isolates: S288c and SK1 (~65,000 SNPs, ~4,000 high confidence INDELS, ~0.57%  
88 divergence; (Martini et al., 2011; Marsolier-Kergoat et al., 2018)). Additionally, we reanalyzed datasets  
89 comprising fifty-one wild-type (Mancera et al., 2011; Chen et al., 2008) and four *msh2Δ* (Oke et al., 2014)  
90 tetrads from a S96 x YJM789 hybrid of *S. cerevisiae* (~0.6% divergence). On average, we identified  $74.3 \pm 5.4$   
91 and  $105.9 \pm 7.8$  COs per meiosis within our SK1 x S288c wild-type and *msh2Δ* samples respectively,  
92 corresponding to a significant 1.4-fold increase in CO frequency ( $p < 0.01$ ; Two-sample T-test) (**Fig. 1b** and  
93 **Supplementary Table 1**). A significant *msh2Δ*-dependent increase (~1.25-fold,  $p < 0.01$ ; Two-sample T-test)  
94 was also observed within the S96 x YJM789 hybrid (**Fig. 1b** and **Supplementary Table 1**)—collectively  
95 reaffirming the known anti-recombinogenic activity of Msh2. Notably, CO frequencies were considerably higher

96 within S96 x YJM789 than S288c x SK1 (91.4 vs. 74.3 COs per wild type meiosis)—suggesting that cross-  
97 specific differences may exist.

98

99 Deletion of *MSH2* also increased observed NCO events in both hybrid crosses (SK1 x S288c: wild type = 30.8;  
100 *msh2* $\Delta$  = 92.8; S96 x YJM789: wild type = 46.8; *msh2* $\Delta$  = 56.3; **Supplementary Table 1**), supporting the  
101 established effect of Msh2 in suppressing both COs and NCOs in hybrid strains as reported previously (Martini  
102 et al., 2011). However, unlike COs, the visibility of NCOs is directly affected both by the true number of  
103 converted and/or heteroduplex markers contained within a NCO event, and by the technical efficiency of calling  
104 what may potentially be only short regions of contiguous nonreciprocal marker change (Marsolier-Kergoat et  
105 al., 2018; Ahuja et al., 2021). NCO frequencies are also more affected by homeostatic effects than are COs  
106 (Martini et al., 2006). For these reasons, quantitative comparisons of NCO frequency changes in the presence  
107 and absence of *MSH2* are not simple to interpret. Instead, we focused our attention on COs where event  
108 visibility is assumed to be similar in the presence and absence of Msh2.

109

110 To investigate any possible effect of Msh2 on CO patterning, we determined the distribution of inter-crossover  
111 distances (ICDs)—the separation (in bp) between successive COs along every chromosome. To  
112 accommodate comparisons between different sample sizes, ICDs were transformed (**Methods** and  
113 **Supplementary Fig. 1**) and visualized in rank order as empirical cumulative distribution functions (eCDFs). In  
114 all mapped strains, CO distributions deviated significantly ( $p < 0.01$ ; Two-sample Kolmogorov-Smirnov (KS) test  
115 (Massey Jr, 1951)) from simulated conditions in which the same frequency of observed COs were distributed  
116 randomly relative to one another (**Fig. 1c–f**). In particular, observed patterns displayed a more homogenous  
117 distribution of ICDs, with fewer short and long distances between adjacent COs than expected by chance. This  
118 change in distribution was visible as a steeper eCDF curve in the experimental data compared to the random  
119 simulation, a feature that was stronger within the S96 x YJM789 cross (**Fig. 1d**) than within S288c x SK1 (**Fig.**  
120 **1c**), additionally suggesting that the meiotic CO landscape is regulated in a cross-specific manner  
121 (**Supplementary Fig. 2** and **Extended discussion**).

122

123 Unexpectedly, deletion of *MSH2* within both hybrid crosses caused ICD curves to skew yet further away from  
124 the random simulation, creating a steeper inflection point (**Fig. 1c-d**;  $p < 0.01$ ; Two-sample KS test) indicative  
125 of increased homogeneity in the spacing of COs relative to one another. Removal of a second MMR factor,  
126 *PMS1*, which acts downstream of Msh2 mismatch binding (Prolla et al., 1994), caused similar changes to both  
127 the CO frequency and the CO distribution curves relative to wild type (**Supplementary Fig. 3a-b**), but no

128 additive effect in a double *msh2Δ pms1Δ* strain was observed—thereby suggesting that these CO changes  
129 arise as a general consequence of MMR inactivation.

130

131 To account for any impact increased CO frequency may have upon CO distribution, we utilized an *ndt80AR*  
132 (“arrest–release”) strain where meiotic prophase length is extended via temporary repression of the Ndt80  
133 transcription factor (Benjamin et al., 2003; Xu et al., 1995; Crawford et al., 2018). On average, we identified  
134  $94.5 \pm 16.3$  COs per meiosis within *ndt80AR*—a significant increase relative to wild type ( $p < 0.01$ ; Two-sample  
135 T-test) (**Fig. 1b**). However, no further increase occurred upon deletion of *MSH2* (*msh2Δ ndt80AR*,  $97.5 \pm 15.4$   
136 COs,  $p = 0.87$ ; Two-sample T-test) (**Fig. 1b**). Importantly, despite the lack of change in CO frequency, the  
137 *msh2Δ*-dependent skew in CO distribution was still observed in *ndt80AR msh2Δ* (**Fig. 1e**) whereas increased  
138 CO frequency alone (*ndt80AR*) did not alter CO distribution compared to wild type (**Fig. 1f**) ( $p = 0.91$ ; Two-  
139 sample KS test).

140

141 Inactivation of MMR within hybrid *S. cerevisiae* strains therefore gives rise to two distinct phenotypes relative  
142 to wild type: (i) increased CO frequency, as previously observed (Martini et al., 2011), and (ii) a global shift in  
143 the distribution of COs relative to one another—something that can arise independently of changes in CO  
144 frequency. Whilst we are not directly measuring interference between COs by these analyses, the latter change  
145 to the CO distribution is consistent with the loss of MMR activity appearing to increase the presence and/or  
146 impact of CO interference within the global pool of COs.

147

#### 148 **Mixture modelling of class I and class II CO distributions**

149 CO distributions can be modelled by the gamma ( $\gamma$ ) distribution, where  $\gamma(\alpha)$  values  $> 1.0$  indicate increasing  
150 deviations from randomness (potentially indicating increasing strength of interference between COs) (McPeck  
151 and Speed, 1995). Importantly, however, because the experimentally observed CO distribution is a composite  
152 mixture of class I (interfering) and class II (non-interfering) COs, models based on a single ( $\gamma$ ) distribution  
153 deviate substantially from experimental data, which contains many more ICDs  $< 50$  kb than expected (**Fig. 2a**).  
154 Indeed, the presence of these short ICDs is consistent with the presence of the subpopulation of randomly  
155 distributed COs (i.e. class II).

156

157 To explore this aspect of the data, we utilised a computational method based on ( $\gamma$ )-mixture modelling (**Fig.**  
158 **2b**), to statistically deconvolute ICD data, thereby deriving estimates of the random and non-random  
159 components (**Methods**). A similar approach has been developed by others to explore the parameters

160 governing the physical positioning of COs along chromosomes (Gauthier et al., 2011). A non-random ( $\gamma(\alpha_I)$   
161  $>3.0$ ), and a random ( $\gamma(\alpha_{II}) \sim 1.0$ ) component was identified for all genotypes (Fig. 2d). Composite simulations  
162 (Supplementary Fig. 4) using the estimated proportions of these two CO distributions improved model fit to  
163 experimental data and eliminated the deviations between simulation and experimental data otherwise  
164 observed for ICDs below 50 kb (Fig. 2c). We henceforth refer to these random and non-random CO  
165 components as estimates of, respectively, the class II and class I CO components.

166  
167 Consistent with prior estimates (de los Santos et al., 2003), using this analysis, *MSH2* wild type class I:class  
168 II ratios were estimated at  $\sim 2.0$  and  $\sim 3.0$  within S288c x SK1 and S96 x YJM789 respectively (Fig. 2d). By  
169 contrast, deletion of *MSH2* increased ratio estimates to  $\sim 5$ -6 in both hybrid crosses (Fig. 2d), suggesting a  
170  $\sim 1.7$ -fold increase in class I CO formation in the absence of Msh2 (Fig. 2e). These models also estimated  
171 *msh2* $\Delta$ -dependent decreases in the absolute frequency of class II CO formation ( $\sim 0.5$  to 0.7-fold) (Fig. 2f).  
172 Importantly, the  $\gamma(\alpha_I)$  value estimates obtained for the non-random (class I) CO population were broadly similar  
173 for all strains, irrespective of Msh2 status or estimate of total class I CO frequency (gamma values between  
174  $\sim 3.0$ – $3.8$ ; Fig. 2d, Mixed fit)—and different from the poorly fitting global  $\gamma(\alpha_s)$  estimates (1.43–2.44) generated  
175 from fitting a single gamma distribution to each entire dataset (Fig. 2d, Single fit).

176  
177 Thus, assuming that our modelling of a mixed gamma distribution is a reasonable estimate of the class I : class  
178 II balance present within cells, these analyses suggest that the global change in CO distribution towards less  
179 randomness in *msh2* $\Delta$  arises not from an increase in CO interference strength between class I COs, but  
180 instead from a change in the relative proportion of class I and class II COs present within the total CO pool.  
181 Specifically, our results suggest that the formation of ZMM-dependent class I COs is preferentially favoured  
182 within Msh2-deficient cells and that most of the additional COs observed within *msh2* $\Delta$  relative to wild type are  
183 class I. Put another way, our observations suggest that the activity of Msh2 disproportionately impedes the  
184 formation of class I COs relative to class II.

### 185 186 **Distribution and frequency of Zip3 foci appear unaltered in *msh2* $\Delta$**

187 Zip3 foci specifically mark the sites of interfering, class I COs (Agarwal and Roeder, 2000; Zhang et al., 2014b).  
188 Our computational analysis predicts an increase in Zip3-marked CO sites, but no change in their relative  
189 distribution along synapsed chromosome axes. Thus, to investigate the results of our modelling, we counted  
190 Zip3 foci (Shinohara et al., 2008) on spread meiotic chromosome preparations from S288c x SK1 hybrids co-  
191 labelled with Zip1-GFP (White et al., 2004), an established marker of chromosome synapsis in *S. cerevisiae*

192 (Fig. 3a-b and Supplementary Fig 5) (Henderson and Keeney, 2004). To reduce observational bias, samples  
193 were randomised, and counting was restricted to only well-spread nuclei showing clear thread-like patterns of  
194 Zip1. Overall, focus number per nucleus was highly variable (10–50 per cell). Perhaps because of this  
195 variation, we were unable to identify any reproducible differences in foci number upon *MSH2* deletion, both in  
196 the wild-type and the pachytene-arrested *ndt80AR* strain background. However, we cannot exclude that this  
197 high variance obscures a real difference.

198

199 Within these data we noticed a modest correlation between spread size and total foci count per spread  
200 (Supplementary Fig. 6a). Thus, to investigate whether technical differences in spreading efficiency was  
201 affecting Zip3 foci counts we further analysed the density of Zip3 foci per  $\mu\text{m}^2$  of spread area bounded by the  
202 chromosomal (DAPI) signal, but, again, found no clear differences caused by *MSH2* deletion (Supplementary  
203 Fig. 6b).

204

205 We next analysed the relative distribution of Zip3 foci along synapsed chromosome axes—a potential indicator  
206 of CO interference—in cells arrested at the pachytene stage via the *ndt80AR* allele (Fig. 3c-f). Measuring the  
207 distances between Zip3 foci along the subset of well-resolved chromosomes in each strain demonstrated  
208 significant deviation from that expected for a random distribution (Fig. 3e) and instead much closer to that of  
209 a simulated interfering distribution (Fig 3f), as expected for Zip3 foci marking interfering Class I events (Zhang  
210 et al., 2014b). However, no additional distributional differences were detected in the absence of Msh2 (Fig.  
211 3e-f). The similarity of the Zip3 foci distribution in the presence and absence of Msh2 is consistent with our  
212 mixture-modelling analysis of CO positions identified in the genome-wide data, which estimated a similar  $\gamma(\alpha_1)$   
213 parameter for the non-random component in all strains regardless of *MSH2* status (Fig 2d, above).

214

215 Whilst the large variation in Zip3 foci frequencies limits our ability to draw firm conclusions, taken together, our  
216 observations suggest that the differences in CO frequency and patterning that are observed in our genome-  
217 wide analysis with and without *MSH2* may arise downstream of the point at which we have assessed Zip3 foci  
218 counts (“pachytene” as mediated by *ndt80Δ* arrest). Specifically, changes in the efficiency of CO designation  
219 and/or maturation arising after this arrest point, and/or independent of Zip3 focus formation, could lead to  
220 differences in observed (Zip3 foci) and final (genome-wide analysis in tetrads) CO frequency and distribution.  
221 This possibility is explored in more detail below.

222

223

## Msh2 specifically impedes class I CO formation at regions of greater sequence divergence

The MMR machinery forms a potent barrier to homoeologous recombination, presumably due to recognition and destabilisation of recombination intermediates containing DNA mismatches. To directly explore the interplay between DNA mismatches and CO formation, we calculated polymorphism densities (SNPs, Indels)  $\pm 500$  bp around every mapped CO (Fig. 4a) and compared between genotypes. To generate a comparative reference point, the expected environment for meiotic recombination, as defined by the polymorphism density surrounding  $\sim 3600$  DSB hotspot midpoints (Pan et al., 2011), was also calculated. Polymorphism density surrounding COs within *MSH2* wild-type strains (S288c x SK1: wild type, *ndt80AR*) was significantly different to that expected in both distribution ( $p < 0.01$ ; Two-sample KS test) and in mean variant density (5.32 vs. 6.18,  $p < 0.01$ ; Two-sample T-test)—characterized by a skew towards COs, on average, arising within regions of lower genetic divergence than expected from the genome-wide position of DSBs (Fig. 4b). By contrast, the polymorphism density around *msh2* $\Delta$  COs displayed visual and statistical similarity to that expected ( $p > 0.25$ ; Two-sample KS-test) (6.26 vs. 6.18,  $p = 0.52$ ; Two-sample T-test) (Fig. 4b). Such a disparity between wild type and *msh2* $\Delta$  was recaptured within the independent S96 x YJM789 hybrid where COs were again skewed towards regions of lower polymorphism density only in the *MSH2* wild-type strain (Fig. 4c). A similar effect was observed when considering polymorphism density arising  $\pm 1000$  bp around each CO but was diminished with increasing distance ( $\pm 2000$  bp)—suggesting that DNA mismatches exert a localised inhibitory effect on CO formation (Supplementary Fig. 7a-b and Supplementary Discussion).

Our mixture modelling suggests that inactivation of *MSH2* alters global CO distribution by altering the relative abundance of class I vs class II COs (Fig. 2 and Fig. 3). To determine whether the influence that Msh2 has in regulating CO class outcome is related to its role in suppressing COs at sites where mismatches will arise during meiotic recombination, we further calculated polymorphism densities within mutants that disrupt class I (*zip3* $\Delta$ , *msh4* $\Delta$ ) or class II (*mms4* $\Delta$ ) CO formation (Oke et al., 2014). Strikingly, mutants devoid of class I COs phenocopied *msh2* $\Delta$ —that is, COs within these mutants were no longer skewed away from regions of higher polymorphism density despite the presence of Msh2—sharing mean polymorphism densities around COs that were not statistically dissimilar to expected ( $p > 0.5$ ; Two-sample T-test) (Fig. 4b-c). Moreover, the impact of *zip3* $\Delta$  and *msh2* $\Delta$  appeared to be epistatic rather than additive, with no further change in the double mutant (Fig. 4b), suggesting a single common pathway. By contrast, removal of class II formation (*mms4* $\Delta$ ) had no impact on the interplay between CO formation and polymorphism density (Fig. 4c)—collectively suggesting that mismatch-dependent repression of CO formation is specific to class I COs.



## 256 **Msh2 activity during class I CO maturation**

257 Whilst our observations provide strong evidence to support a disproportionate impact of Msh2 and  
258 polymorphisms on COs formed via the class I pathway, the time and mode of action within the HR process  
259 that this occurs is unclear. To explore in more detail the possibility of early (designation) versus late  
260 (maturation) action of Msh2, we generated simulations in which mixed patterns of COs (ranging from 100%  
261 class I to 50% class I : 50% class II) were subject to varying rates of stochastic class I CO failure (up to 50%  
262 loss)—simplistically mimicking the possible outcome of class I CO maturation failure at a (late) stage  
263 downstream of interference-patterned CO designation (**Fig. 5a** and **Methods**). Resulting genome-wide  
264 patterns of simulated CO formation (presented as eCDF curves of inter-CO distances as in **Fig. 1c-f**) were  
265 then compared to our experimentally observed CO patterns and tested for statistical similarity (**Fig. 5b-g**). For  
266 *msh2Δ* datasets, in both SK1xS288c (**Fig. 5b-c**) and S96xYJM (**Fig. 5d**), better fits ( $P > 0.9$ , KS test) were  
267 obtained only for parameter combinations in which either class II CO formation was low (as described above)  
268 and/or maturation failure was low—consistent with the relatively regular (interfering) genome-wide pattern of  
269 COs observed in these strains (**Fig. 1c-f**).

270  
271 By contrast, and as described above, wild-type cells, where Msh2 is active, displayed global CO patterns that  
272 were better fit ( $P > 0.9$ ; KS Test) with a greater proportion of class II COs (**Fig. 5e-g**; ~30% in SK1xS288c;  
273 ~20% in S96xYJM). However, these simulations also identified a diagonal band of reasonable parameter fits  
274 ( $P > 0.8$ ; KS Test) where decreasing proportions of class II COs were offset by increasing chances of class I  
275 CO maturation failure (**Fig. 5e-g**). This trend was clear, albeit relatively modest, in the SK1xS288c hybrid, but  
276 was enhanced in S96xYJM, where the highest density of good statistical fits ( $P > 0.9$ ; KS test) was obtained for  
277 relatively low fractions of class II COs (~5-10%), similar to the estimates obtained in *msh2Δ* cells, but with high  
278 rates of class I CO maturation failure layered on top (20-40%; **Fig. 5g**).

279  
280 Collectively, our simulations suggest that intrinsic rates of class I maturation failure may be quite low in *msh2Δ*  
281 hybrid cells. By contrast, mismatch-dependent class I maturation failure, downstream of CO designation, and  
282 thus potentially quite late in meiotic prophase, may underpin at least some of the apparent reductions in class  
283 I COs observed in *MSH2* control cells—an effect that may be more prevalent in certain hybrids such as  
284 S96xYJM.

285

286

287

288 **Discussion**

289 Sequence divergence suppresses recombination within a wide range of eukaryotes including *S. cerevisiae*, *M.*  
290 *musculus* and *H. sapiens* (Chambers et al., 1996; Hunter et al., 1996; Bozdag et al., 2021; Cole et al., 2010;  
291 Baudat and de Massy, 2007b; Jeffreys and Neumann, 2005). Findings presented here expand upon these  
292 observations and suggest that the anti-recombinogenic activity of Msh2, exerted at homoeologous sites, does  
293 not mediate an indiscriminate suppression of COs but rather acts disproportionately at sites of ZMM-  
294 dependent, interfering COs (Fig. 6a-c)—thereby altering the spatial distribution of CO recombination across  
295 the genome by modulating the class I : class II balance. Our observations underscore how even the low rates  
296 of divergence (~0.6%) present within intra-specific hybrids of *S. cerevisiae* can generate global changes in CO  
297 frequency, CO type, and genome-wide distribution. Nevertheless, in wild-type hybrids when Msh2 is active,  
298 COs still frequently arise within heterologous regions (Fig. 4b-c) with class I COs still forming at a high rate  
299 (67%-75% of total COs; Fig. 2d). Mismatches do not, therefore, form an absolute barrier to class I COs, but  
300 instead seem to influence the probability of their formation.

301

302 Current models posit that the establishment and differentiation of class I COs is a multi-step process starting  
303 with nascent recombination interactions initiated by Spo11 DSBs, designation as class I precursors, and  
304 subsequent maturation into the final class I COs (Zhang et al., 2014a). Inefficient maturation—downstream of  
305 the implementation and patterning effects of CO interference—has been proposed as a mechanism to explain  
306 CO patterns and the innate predisposition towards meiotic chromosome missegregation in human females  
307 (Wang et al., 2017).

308

309 Within this framework, it is therefore important to consider at what stage Msh2 activity causes class I CO  
310 precursors to be redirected towards alternative outcomes. Prior analyses aimed at elucidating the CO  
311 differentiation process have harnessed relatively deep (rather than broad) datasets in order to build probability  
312 distributions of expected coincident class I COs at adjacent positions along specific chromosomes (Zhang et  
313 al., 2014a). By contrast, our genome-wide maps of CO position are broad, encompassing positional  
314 information for every CO on every chromosome in individual meioses, but are of limited depth at any given  
315 locus due to the limited throughput of genome-wide sequencing of meiotic progeny (six wild type and thirteen  
316 *msh2Δ* meioses in the S288c x SK1 hybrid). These differences preclude us from performing a similar analysis.  
317 Moreover, unlike the specificity of Zip3-focus analysis for class I COs, genome-wide CO maps cannot yet  
318 distinguish between class I and class II COs at any given site. For these reasons, we have focused on

319 analysing Msh2-dependent differences in the fine-scale positions of COs and in the distribution of COs relative  
320 to one another.

321

322 When considering global CO positions, conversion from a class I to a class II CO would still give rise to a CO  
323 in the same position and with no change in global CO frequency. Thus, because we observe changes in CO  
324 pattern and frequency, we infer that most Msh2-redirected class I events become NCOs and/or become  
325 otherwise invisible within our assay (**Fig. 6c**). On this latter point, recent work provides evidence for frequent  
326 repair-template switches between homologues and sister chromatids (Marsolier-Kergoat et al., 2018; Ahuja et  
327 al., 2021), and thus redirection of CO precursors towards repair exclusively using identical sequences on the  
328 sister chromatid is also possible (events that would be invisible in our assays). However, such redirection  
329 would seemingly need to happen prior to the priming of DNA synthesis by a DSB end that has invaded the  
330 homologue (**Fig. 6a**). Alternatively, Msh2-dependent redirection towards inter-sister events and NCOs may  
331 occur concomitantly with mismatch repair, leading in some cases to restoration of any heteroduplex markers  
332 back to the parental configuration, again precluding detection by our methods (**Fig. 6c**).

333

334 The fact that the estimated frequency of class II COs was greater, in absolute terms, in Msh2-proficient cells  
335 suggests that Msh2-dependent suppression of class I COs may indirectly influence class II CO formation. For  
336 example, more class II events (arising from increased Spo11 activity) might be enabled by spatial and/or  
337 temporal changes in the efficiency of homologue engagement caused by MMR-dependent rejection of nascent  
338 recombination events, similar to when class I CO formation (Thacker et al., 2014) and/or chromosome synapsis  
339 (Mu et al., 2020) is disturbed by genetic mutation. However, we did not detect any obvious Msh2-dependent  
340 differences in synapsis within hybrid strains (**Fig. 3b**), suggesting that, if present, such effects are transient  
341 and/or relatively subtle.

342

343 In our envisioned model (**Fig. 6a-c**), which builds upon prior ideas (Chambers et al., 1996; Hunter et al., 1996),  
344 rejected class I events may be redirected towards the NCO pathway relatively early on during CO designation  
345 and/or maturation via unwinding of the initial strand invasion intermediate with repair proceeding via synthesis-  
346 dependent strand annealing (SDSA; (Marsolier-Kergoat et al., 2018; Ahuja et al., 2021)). Alternatively,  
347 redirection could occur at a later stage, for example after class I CO precursors reach the double Holliday  
348 junction (dHJ) stage. The potential for dHJs to undergo branch migration (Marsolier-Kergoat et al., 2018; Ahuja  
349 et al., 2021) may generate large patches of heteroduplex DNA that could in turn be efficiently detected by the  
350 MMR machinery and stimulate Sgs1-Top3-Rmi1-dependent dissolution. It is also possible that mismatches

351 cause dHJs to be more-frequently resolved as NCOs nucleolytically (perhaps via nicks generated by the MMR  
352 process itself), whereas an almost absolute bias towards CO resolution is observed in the absence of Msh2  
353 (Marsolier-Kergoat et al., 2018).

354

355 Our apparent inability to detect Msh2-dependent differences in the frequency of Zip3-marked CO precursors  
356 at the pachytene-like arrest enforced by *NDT80* deletion where dHJs accumulate (**Fig. 3**; (Allers and Lichten,  
357 2001)), indeed suggests that at least some class I redirection may arise after this dHJ stage. A late-stage  
358 activity of Msh2 that disturbs class I CO formation would also be compatible with our simulations of CO  
359 maturation failure in wild-type, but not *msh2Δ* cells (**Fig. 5**). However, why the two hybrids studied here  
360 behaved differently in this regard is unclear but might suggest differing propensity for Msh2 to elicit anti-CO  
361 effects before, during, or after CO patterning has completed.

362

363 It is also possible that the distributional differences in CO patterns we have observed are patterned by  
364 processes that are independent of CO interference and the class I or class II CO pathways. Non-uniform  
365 densities of DNA-sequence polymorphisms, DSBs, and even COs themselves all have the potential to  
366 influence the relative CO distributions that arise on a per-cell basis. However, polymorphisms, DSBs, and COs  
367 are relatively evenly spread across the entire length of each chromosome in *S. cerevisiae* (**Supplementary**  
368 **Fig. 8a-d**), and thus as expected, biasing CO site selection by these underlying population-level parameters  
369 had no measurable impact on resulting patterns of simulated inter-CO distributions (**Supplementary Fig. 8e-**  
370 **g**). Nevertheless, we recognise that non-random distributions of precursor events in individual cells can  
371 influence downstream patterns of COs (Zhang et al., 2014a), without necessarily generating nonuniformity  
372 when assayed across a population. In addition, in organisms with less uniform SNP/indel density, and/or  
373 propensity to initiate recombination, such non-uniformity could result in a redistribution of CO formation towards  
374 certain regions, potentially influencing relative CO patterning on a per-cell basis (e.g. the effect that highly  
375 heterologous regions have in *A. thaliana* (Ziolkowski et al., 2015)).

376

377 In mitotic cells, inhibition of homoeologous recombination by means of heteroduplex rejection, relies upon  
378 Msh2 and the RecQ-family helicase, Sgs1 (Sugawara et al., 2004; Goldfarb and Alani, 2005; Spies and Fishel,  
379 2015). An *sgs1Δ* mutant may therefore be expected to phenocopy *msh2Δ* if suppression of class I COs occurs  
380 via this mechanism. Intriguingly, however, the distribution of COs is more random in *sgs1Δ* relative to wild type  
381 (**Supplementary Fig. 3c**), suggesting a decrease in the proportion of class I COs. Moreover, *sgs1Δ* also  
382 abolishes the increased skew towards nonrandomness (inferred above to indicate an increased frequency of

383 class I COs) caused by *MSH2* deletion (**Supplementary Fig. 3d**)—suggesting that Msh2 and Sgs1 are not  
384 epistatic, but rather antagonistic in the formation of class I COs. Thus, it is possible that Msh2 mediates  
385 suppression of class I COs in a pathway different to that of Sgs1-mediated heteroduplex rejection, instead  
386 relying upon the downstream properties or factors of MMR, including Pms1 (**Supplementary Fig. 3a**), to  
387 achieve its effect. Alternatively, the genetic complexity outlined above may arise because Sgs1 can act at  
388 multiple steps and on a range of recombination intermediates. For example, at early stages Sgs1 could act to  
389 promote class I CO formation by unwinding nascent recombination intermediates—independently of Msh2 and  
390 mismatches—thereby allowing them to be recycled into future potential class I precursors (Oh et al., 2007;  
391 Tang et al., 2015; Kaur et al., 2015). By contrast, perhaps mediated by mismatch- and Msh2-dependent  
392 destabilisation of pro-class I CO factors, Sgs1 activity at a later stage could promote dHJ dissolution thereby  
393 suppressing class I maturation.

394

395 It is important to consider how MMR-specificity for class I COs may arise. Msh2, Mlh1 and Pms1 form a ternary  
396 complex during MMR (Li, 2008) and *in vitro* data suggest that Mlh1-Mlh3—essential class I CO factors—  
397 facilitate binding of Msh2 to heteroduplex DNA arising, for example, at sites where mismatches exist between  
398 parental strains (Rogacheva et al., 2014). Msh2 itself, via interaction with Msh6, also directly binds Holliday  
399 junctions with high affinity (Alani et al., 1997). Thus, Mlh1-Mlh3, or the inherent structure of class I precursors,  
400 may be responsible for the differential sensitivity of each CO subclass to sequence mismatches through  
401 preferential recruitment or activation of Msh2 and MMR at class I sites. Indeed, available data (Getz et al.,  
402 2008) suggest that Class I COs are more likely to recruit MMR and lead to conversion/restoration (6:2, 4:4  
403 patterns)—or possibly rejection (our results). By contrast, class II COs are less likely to recruit MMR, and thus  
404 not only survive in MMR-proficient cells but also show signs of post-meiotic segregation (Getz et al., 2008).  
405 Such mechanisms would fit with the specific reductions in class I COs that we observe in MMR-proficient cells.

406

407 Given the evolutionary conservation of MMR and of the fundamental process of CO recombination in meiosis,  
408 an important consideration is whether the processes uncovered by our study are conserved across biology.  
409 With this in mind, it is interesting to note that a detailed analysis of two Spo11-DSB hotspots in *M. musculus*  
410 found no evidence for MSH2-dependent suppression of recombination (Peterson et al., 2020). Furthermore, a  
411 recent genome-wide study in *A. thaliana* indicates redistribution of COs towards, rather than away from,  
412 polymorphic regions in MMR-proficient control lines relative to a *msh2* mutant (Blackwell et al., 2020). Thus, it  
413 will be critical to elucidate what are the mechanistic relationships that underpin these species-specific  
414 observations. Such differences may be directed by species-specific modulation of MMR activity at pro-CO

415 sites, or by fundamental genome-scale differences that influence meiotic recombination, such as chromosome  
416 size, global recombination rate (high in yeast), distribution of DNA sequence heterozygosity (non-uniform in *A.*  
417 *thaliana*), and regulation of recombination initiation (PRDM9 dependent in *M. musculus*).

418

419 Overall, understanding the molecular mechanisms that contribute to speciation is fundamental to our  
420 understanding of biological diversity and evolution. In this regard, despite many unknowns remaining, our  
421 observations highlight an unexpected link between DNA sequence divergence, MMR, and meiotic class I CO  
422 control, thereby intimately linking the regulation of CO numbers and their distribution to pathways contributing  
423 to reproductive isolation and eventual speciation.

424

## 425 **Contributions**

426 T.J.C, M.R.C. and M.J.N. conceived of the project. M.R.C. performed all wet-lab work, data processing and  
427 event calling associated with the genome-wide mapping. T.J.C. analysed and interpreted the data, performed  
428 in-silico simulations, and designed the modelling algorithms. L.J.H. performed all microscopy and foci analysis.  
429 M.M.K. and B.L. provided scripts, protocols, additional samples, and ideas. T.J.C., M.J.N., and B.L. wrote the  
430 manuscript with critical input from all authors.

431

## 432 **Acknowledgements**

433 We thank A. Shinohara for sharing anti-Zip3 antibody (Shinohara et al., 2008) and R. M. Allison for help with  
434 image acquisition.

435

## 436 **Competing interests**

437 The authors declare no competing financial interests.

438

## 439 **Corresponding authors**

440 Correspondence to:

441 Matthew J. Neale ([m.neale@sussex.ac.uk](mailto:m.neale@sussex.ac.uk)) and Bertrand Llorente ([bertrand.llorente@inserm.fr](mailto:bertrand.llorente@inserm.fr))

442

## 443 **Funding**

444 T.J.C, M.R.C, L.J.H and M.J.N were supported by an ERC Consolidator Grant (#311336), the BBSRC  
445 (#BB/M010279/1) and the Wellcome Trust (#200843/Z/16/Z).

446 B.L. lab was funded by the ANR-13-BSV6-0012-01 grant from the Agence Nationale de la Recherche and a  
447 grant from the Fondation ARC pour la Recherche sur le Cancer (SF120121205448).

448

## 449 **Data Availability**

450 Raw sequence data is deposited in the NIH Sequence Read Archive (SRA) under accession numbers  
451 [SRP151982](#) (wild type, *msh2Δ*, *ndt80AR*), [SRP111430](#) (*msh2Δ*), and [SRP152953](#) (*zip3Δ*). Scripts, tools,  
452 software and additional data are available at: <https://github.com/Neale-Lab> and  
453 <https://github.com/NealeTools/RecombineSim>

454

## 455 **Methods**

### 456 **Yeast Strains**

457 All *Saccharomyces cerevisiae* strains used in this study are derivatives of SK1 (Kane and Roth, 1974) and  
458 S288c (Mortimer and Johnston, 1986). Hybrid strains, utilised in genome-wide mapping, were derived from a  
459 cross of haploid SK1 and S288c, or used published datasets from a cross of S96 x YJM789 (Chen et al., 2008;  
460 Mancera et al., 2008; Oke et al., 2014; Al-Sweel et al., 2017). Strain genotypes are detailed in ([Supplementary](#)  
461 [Table 2](#)). Knockouts were performed and tested by standard transformation and PCR techniques (Longtine et  
462 al., 1998). *msh2Δ::kanMX6* and *zip3Δ::HphMX* were generated by PCR mediated gene replacement using a  
463 pFA6a-*kanMX6* or pFA6-*hphMX* plasmid (Goldstein and McCusker, 1999). The *P<sub>GAL</sub>-NDT80::TRP1* allele has  
464 the natural *NDT80* promoter replaced by the *GAL1-10* promoter, and strains include a *GAL4::ER* chimeric  
465 transactivator for  $\beta$ -estradiol-induced expression (Benjamin et al., 2003). For cytological analyses in hybrid  
466 strains, Zip1-GFP (White et al., 2004) was expressed heterozygously from the SK1 parent only. S288c x SK1  
467 hybrids create viable spores (91.98% WT, 72.99% *msh2Δ* spore viability), limiting observational bias that may  
468 arise from assaying a limited, surviving population (Crawford et al., 2018).

469

### 470 **Meiotic Timecourse (*ndt80AR* strains)**

471 Diploid strains were incubated at 30°C on YPD plates for 48h. For SK1 diploids, a single colony was inoculated  
472 into 4 mL YPD (1% yeast extract, 2% peptone, 2% glucose) and incubated at 30°C at 250 rpm for 24 h. For  
473 hybrid crosses, haploid parental isolates were mated in 1 mL YPD for 8 h. An additional 3 mL of YPD was  
474 subsequently added and the cells were grown for 16 h. Cells were inoculated to a density of (OD<sub>600</sub>) 0.2 into  
475 30 mL YPA (1% yeast extract, 2% peptone, 1% K-acetate) and incubated at 250 rpm at 30°C for 14h. Cells  
476 were collected by centrifugation, washed in H<sub>2</sub>O, and resuspended in 30mL pre-warmed sporulation media

477 (2% potassium acetate, 5 µg/mL Adenine, 5 µg/mL Arginine, 5 µg/mL Histidine, 15 µg/mL Leucine, 5 µg/mL  
478 Tryptophan, 5 µg/mL Uracil). The culture was then incubated at 30°C at 250 rpm for the duration of the time  
479 course. After 8h, 2 mL of the synchronised cultures were split and exposed to β-estradiol to a final  
480 concentration of 2 mM, which induces the transcription of *NDT80* and thus sporulation. Cultures were then  
481 incubated to a total of 48 h at 30°C prior to dissection. For microscopy cells were pre-grown in BYTA medium  
482 (buffered 1% yeast extract, 2% tryptone, 1% K-acetate) and *ndt80AR* cultures were not released with β-  
483 estradiol.

484

#### 485 **Tetrad Dissection**

486 In order to produce hybrid spores for sequencing, SK1 x S288c haploid parents were mated for 8-14 h on YPD  
487 plates, with the exception of *ndt80AR* strains, which were mated and grown in liquid YPD for 24 h (see above).  
488 Haploids were mated freshly on each occasion and not propagated as diploids in order to reduce mitotic  
489 recombination. Sporulation was induced, and tetrads were dissected after 72 h in 2% potassium acetate. For  
490 octads, spores were additionally grown for 4–8 h on YPD plates until a single mitotic division had completed,  
491 after which the mother-daughter pair were separated. Colonies were grown for 16 h within liquid YPD for  
492 genomic DNA extraction. Only tetrads and octads producing four or eight viable spores/colonies, respectively,  
493 were considered for genotyping by NGS.

494

#### 495 **NGS Library Preparation**

496 Genomic DNA was purified from overnight, saturated YPD cultures using standard phenol-chloroform  
497 extraction techniques. Samples of genomic DNA were diluted to 0.2–0.3 ng/µL. DNA concentration was  
498 measured using the Qubit High Sensitivity dsDNA Assay. Genomic DNA was fragmented, indexed and  
499 amplified via the Nextera XT DNA library Prep Kit according to the best practices recommended by Illumina.  
500 In order to check fragment-length distribution and concentration of purified libraries, 1 µL of undiluted library  
501 was run on an Agilent Technology 2100 Bioanalyzer using a High Sensitivity DNA chip. To pool samples for  
502 sequencing, 5 µL of each sample was combined into a 1.5 mL tube and mixed. 24 µL of the mix was transferred  
503 to a tube containing 570 µL hybridisation buffer. The mix was boiled at 96°C for 2 minutes and placed in ice  
504 water for 5 minutes. 6 µL of denatured PhiX control (prepared according to Illumina protocol, final concentration  
505 1%) was added to the library, mixed well and then loaded into a MiSeq reagent cartridge. Sequencing was  
506 performed in-house using an Illumina MiSeq instrument.

507

508



## 509 **Alignment, SNP and indel Detection**

510 Individual spores were sequenced to an average read-depth of ~45x. Initially, paired-end read FASTQ files  
511 are aligned, via Bowtie2 (Langmead and Salzberg, 2012), to the SacCer3 reference genome (v. R64-2-1;  
512 (Engel and Cherry, 2013)) using the parameters: -X 1000 —local —mp 5,1 -D 20 -R 3 -N 1 -L 20 -i S,1,0.50.  
513 In order to create a custom SK1 genome to facilitate more accurate genotype-calling, SNP and indel  
514 polymorphisms were detected using the GATK (GenomeAnalysisToolkit) function *HaplotypeCaller* (Van der  
515 Auwera et al., 2013). An in-house script (*VariantCaller.pl*) subsequently parses the resulting VCF files from 72  
516 spores to calculate: (i) the call frequency (% of spores any given allele is present within), (ii) the cumulative  
517 allelic read depth (% of reads that contain a specific allele at a specific loci), and (iii) the cumulative total read  
518 depth. To identify legitimate SNPs and indels, variants were filtered for a call-frequency between 44-55%, a  
519 total read depth of >250 and an allelic read depth of 95%. Variants within repeat regions, long terminal repeats,  
520 retrotransposons and telomeres were also discarded—yielding a final, robust list of 64,591 SNPs and 3972  
521 indels amounting to ~0.57% divergence. A custom SK1 genome (SK1\_Mod) was then generated by modifying  
522 SacCer3 (v. R64-2-1) to include all filtered/called SNPs and indels.

523

## 524 **Genotype-Calling**

525 Spore data from individual samples was aligned to both the custom SK1\_Mod genome and the SacCer3  
526 reference (see below). Alignment produced a SAM file, which was converted into a sorted BAM file using the  
527 Samtools function, *view* (Li et al., 2009), for downstream processing. The PySamStats (v. 1.0.1, Miles &  
528 Mattioni) module, *variation*, was used to process the sorted BAM file for each sequenced spore, producing a  
529 list of the number of reads containing A/C/T/G, insertion or deletion for each genomic position specified in the  
530 S288c and SK1 references. Variant reads were isolated and genotyped using in-house, custom scripts as  
531 follows. Genotypes were assigned according to the rules: (i) A minimum coverage-depth of 5; (ii) A SNP was  
532 called as having the variant genotype if  $\geq 70\%$  of the reads at that position match the called variant, or as  
533 reference if  $\geq 90\%$  of the reads match the reference; (iii) If the variant and reference reads were above 90%  
534 of all reads and within 70% of each other, the position was called as heteroduplex; (iv) indels are called as  
535 having the variant genotype if  $\geq 30\%$  of the reads at that position matched the variant. Such a low threshold  
536 was utilised because alignment of indel sequences is biased towards the reference, which means that they  
537 are unlikely to be erroneously called as matching the variant genotype. For an indel to be called as the  
538 reference genotype,  $\geq 95\%$  of the reads must match the reference sequence and there must be fewer than  
539 two reads matching the variant call. Any variants that fall below these thresholds were discarded. Genotype  
540 calls were converted into a binary signal, either 1 for S288c or 0 for SK1.

## 541 **Event Calling**

542 Using the binarised input, chromosomes were split into segments with the same segregation pattern using  
543 published scripts (Marsolier-Kergoat et al., 2018). Segment types (i.e. 1:7, 2:6, 2:6, 3:5, 4:4, 4:4\*, 5:3, 6:2, 6:2\*  
544 or 7:1 as previously described (Martini et al., 2011; Marsolier-Kergoat et al., 2018) were also recorded.  
545 Recombination events were subsequently called as being a set of segments located between two 4:4  
546 segments longer than 1.5 kb (Marsolier-Kergoat et al., 2018). A 4:4 segment corresponds to a Mendelian  
547 segregation profile, 5:3 and 3:5 segments to half-conversion tracts, and 6:2 and 2:6 segments to full conversion  
548 tracts. Each recombination event can contain between 0–2 COs or NCOs. Events were additionally classified  
549 by the number of chromatids involved (i.e. 1, 2, either sister or non-sister, 3, 4). To ensure compatibility with  
550 our data-analysis pipeline, published binarised input data (“segFiles”) from the S96 x YJM789 hybrid (Chen et  
551 al., 2008; Mancera et al., 2008; Oke et al., 2014; Al-Sweel et al., 2017), were minimally processed to match  
552 column naming, with spores from tetrads each duplicated to create a fake “octad”. This conversion involved  
553 no changes in data, only minimal reformatting. Recombination events were then called in the same way as for  
554 SK1 x S288c octads generated for this study. Any small differences in CO and NCO counts and positions  
555 between the resulting data and that published are likely, therefore, to be due to subtle differences in the event  
556 calling criteria used (for example event merging thresholds).

557

## 558 **Event Position & Inter-Crossover Distances (ICDs)**

559 Crossover position, or “midpoint”, is defined as the distance between the mid-points of the first and last  
560 SNP/indel markers—an estimate of true event tract length. Inter-crossover distances (ICDs) were then  
561 calculated as the distance (in bp) between successive CO midpoints.

562

## 563 **( $\gamma$ )-Mixture Modelling**

564 Distributional analysis of CO distributions is complicated by the existence of non-interfering, Mus81-Mms4  
565 class II COs—indistinguishable from interfering ZMM-dependent class I COs in our assay. In essence, meiotic  
566 ICDs represent a heterogenous, mixed system (**Fig. 2b**) with unknown quantities of each subclass. Latent  
567 variables (e.g. class II CO %) may, however, be inferred through probabilistic and statistical methods.  
568 Expanding upon the use of the gamma ( $\gamma$ ) distribution to model meiotic ICDs from this type of data (Chen et  
569 al., 2008; Anderson et al., 2015), experimental data was deconvoluted by fitting two ( $\gamma$ ) distributions—one for  
570 each subclass of CO—via an expectation maximisation (EM) algorithm (MATLAB 2018a). EM is a commonly  
571 applied method for iterative clustering and parameter estimation in mixed models (Do and Batzoglou, 2008).  
572 Briefly, any given ICD was assigned a probability reflective of how likely it is to belong to one of the two sub-

573 distributions. Subsequently, sub-distributions were iteratively shifted, and data point identity was reassigned  
574 until a maximum likelihood (ML) solution was converged upon. One ( $\gamma$ ) distribution is expected to yield a final  
575 ( $\gamma$ )( $\alpha$ ) value of  $\sim 1.0$  (class II, random), while the other is expected to produce a ( $\gamma$ )( $\alpha$ ) value of  $>1.5$  (class I,  
576 non-random), with their relative contributions to the overall mixture (i.e. the class I:class II ratio) is dependent  
577 upon genotype. To validate this approach, simulated ICD datasets of two component mixtures with known  
578 parameters, at variable sample sizes ( $S$ ), were generated using *RecombineSim* and deconvoluted  
579 (**Supplementary Fig. 4b**; see below). As a measure of accuracy, the average % difference ( $N(\% \Delta)$ ) between  
580 estimated and actual parameters was calculated. To calculate average percentage differences  $N(\% \Delta)$   
581 generated by the simulation, each simulated mixture (at each sample size) was performed 100 times. Gamma-  
582 parameter estimates were obtained for each simulation. The parameters obtained each time were:  $\gamma(\alpha)1$ ,  
583  $\gamma(\beta)1$ ,  $\gamma(\alpha)2$ ,  $\gamma(\beta)2$ , and the proportional weight of the non-random gamma present in the mixture ( $W1$ ).  
584 Estimated values of each parameter were then compared to the actual values used to generate the simulated  
585 mixture via the standard percentage difference formula:  $(|X1-X2| / [(X1+X2)/2]) * 100$ . This calculation was  
586 repeated for all five of the estimated parameters, with each averaged across the 100 repeats to obtain the final  
587 estimated percentage difference value for each parameter. Because final errors for each of the five parameters  
588 were found to be similar to one other within each trial, they were averaged to obtain a single  $N(\% \Delta)$  value  
589 (**Supplementary Fig. S4b-c**). Accuracy is dependent upon sample size ( $S$ ) and to a lesser extent on the relative  
590 proportions of each subpopulation—and thus how likely a subpopulation is to be readily observed within the  
591 mixed population. For example, ( $\gamma$ ) mixtures containing 10 or 25% class II COs exhibit average errors of 10.0%  
592 and 9.1% at ( $S$ ) = 500 and 4.53% and 3.73% at ( $S$ ) = 2000 respectively (**Supplementary Fig. 4c**).  
593 Experimental datasets range from ( $S$ ) values of 354 to 3365, therefore reasonable error rates of  $\sim <10\%$  were  
594 expected.

595

596 A similar mixed-modelling approach (CODA) has been used to estimate relative proportions of mixed gamma  
597 populations for distributions of COs along multiple observations of a chromosome (Gauthier et al., 2011). Initial  
598 attempts to use this software failed presumably due to our low sample number. We circumvented this problem  
599 by concatenating the genome-wide set of inter-CO distances within a single meiosis to generate single pseudo  
600 (giant) chromosome encompassing, effectively, the entire yeast genome. Best-fit non-random gammas and  
601 proportions of the non-random (sprinkling) component were subsequently estimated as: Wild type ( $\alpha =$   
602 3.4, proportion 0.28); *msh2* $\Delta$  ( $\alpha = 3.9$ , proportion 0.11). Such estimates are similar to those obtained using  
603 our direct gamma mixture-modelling algorithm (e.g. **Fig. 2d**).

604

## 605 **Simulating patterns of class I and class II CO formation**

606 Randomised or mixed (class I + class II) ICD simulations were performed using a simulation platform  
607 (*RecombineSim*) built in MATLAB 2018a. A typical simulation run is depicted in ([Supplementary Fig. 4a](#)). In  
608 brief, virtual *S. cerevisiae* chromosomes are constructed as binned, numerical arrays at a 100 bp resolution  
609 adjusted to reflect the limit of experimental detection governed by the leftmost and rightmost genetic markers  
610 (SNPs/indels). Any given 100 bp bin possesses a numerical recombination potential ( $\text{recom}(P)$ ), which governs  
611 the ability of an interfering CO to successfully form at that site. Once formed within the simulation, class I COs  
612 impose a zone of “interference”, by altering  $\text{recom}(P)$  values in adjacent bins in a distance-dependent  
613 manner—a similar principle to the beam-film model of CO interference (Zhang et al., 2014a). The exact shape  
614 and width of interference imposed was determined by the best fit ( $\gamma$ ) parameters ( $\alpha$ ,  $\beta$ ) obtained from the MLE  
615 mixture modelling (see above) for the genotype currently being simulated—and applied as a hazard function  
616 (EQN 1.1):

$$617 \quad h(x) = \frac{PDF(x)}{1-CDF(x)} \quad (1.1)$$

618 A hazard function describes the probability that, given a pre-existing CO at position  $x(0)$ , another CO will form  
619 at any given distance ( $x$ ) away (Chen et al., 2008)—and thus is a natural representation of interference. A  
620 fractional amount of class II COs that remain insensitive to  $\text{recom}(P)$  are introduced via the  $C_{\text{PROB}}$  parameter  
621 where necessary as in gamma-sprinkling models (Copenhaver et al., 2002; Housworth and Stahl, 2003;  
622 Housworth and Stahl, 2003; Falque et al., 2009). In order to closely match the in vivo datasets, simulated CO  
623 events arising within 1.5 kb of one another were also merged, creating a single visible event at the midpoint.

624  
625 To explore the impact that failed class I CO maturation may have on genome-wide patterns, simulations were  
626 additionally performed in which, for a controlled (and variable) fraction of class I events, the class I event itself  
627 was removed from the population of counted events only after implementation of interference around the site  
628 of this precursor event. Such “failed-maturation” events are thus influenced by pre-existing patterns of  
629 interference, and indeed influence the probability of flanking class I CO events that may arise later in the  
630 simulation, but are not themselves counted, and thus do not contribute directly to the final pattern or frequency  
631 of CO events reported.

632  
633 In all cases, simulations ( $N = 10,000$  cells) were iterated until the final frequency of visible COs (class I plus  
634 class II) per simulated cell equaled the frequency observed for a given genotype. Thus, when events were

635 merged, and/or when events were removed (to simulate maturation failure), additional CO events were  
636 simulated for those cells.

637

### 638 **ICD Transformation**

639 The formation of a variable number of events (N) within a finite space (*lim*) (i.e. a chromosome or genome  
640 length) skews CDFs i.e. a higher CO frequency causes a downward shift in ICD size. An ICD distribution  
641 produced under identical spatial rules but with a different event count would therefore generate significantly  
642 different CDFs—failing or biasing statistical testing and undermining the ability to assess distributional  
643 agreement. This skew can be readily observed using simulated data ([Supplementary Fig. 1a](#)). Notably, higher  
644 values of (N) cause a leftward skew. The relationship between (N) and ICD size for a given *lim* is, however,  
645 linear (Batten et al., 1993). Consequently, in order to isolate the distributional identity of any given sample (i.e.  
646 isolate  $\gamma(\alpha)$  from  $\gamma(\beta)$ ), ICD data can be transformed by calculating the product of ICD size (ICD x event count).  
647 Data transformation results in perfectly aligned CDFs despite varying (N), validating this approach  
648 ([Supplementary Fig. 1b](#)).

649

### 650 **Statistical Analyses**

651 A *Kolmogorov-Smirnov* goodness-of-fit (GoF) test is a non-parametric test used to compare continuous  
652 probability distributions in order to assess the null hypothesis that both samples derive from identical  
653 populations, based on their maximal difference ( $D_{KS}$ ) (Massey Jr, 1951; Miller, 1956). (P) values of the KS-test  
654 effectively describe the probability that, if the null hypothesis is true, the observed CDFs would be as far apart  
655 as observed. (P) values may therefore constitute an indirect measure of distributional agreement, as employed  
656 throughout this paper. KS-tests were performed using the MATLAB 2018a packages: *kstest* and *kstest2*. A  
657 two-sample T-test was utilised to determine whether a difference in mean value is significant or has arisen by  
658 chance. Two-sample T-Tests were performed using the MATLAB 2018a package: *ttest2*.

659

### 660 **Microscopy and Cytological Analysis**

661 4.5 mL of meiotic culture was spun down on a bench centrifuge and resuspended to 500  $\mu$ L with 1M pH 7.0  
662 D-Sorbitol. 12  $\mu$ L of 1.0 M DTT and 7  $\mu$ L of 10 mg/mL Zymolyase in 10% glucose solution was added and cells  
663 were spheroplasted by incubation at 37°C for 35–50 min with agitation. Spheroplasting success was  
664 determined by taking 2–3  $\mu$ L of the solution and adding an equivalent volume of 1.0% (w/v) Sodium N-  
665 Lauroylsarcosine while under microscopic observation. Cells should immediately lyse as the exposed  
666 membrane is disrupted by the detergent. 3.5 mL of Stop Solution (0.1M MES, 1 mM EDTA, 0.5 mM MgCl<sub>2</sub>, 1M

667 D-Sorbitol, pH 6.4) was subsequently added and the cells were spun down to be resuspended in 100  $\mu$ L  
668 Spread Solution (0.1M MES, 1 mM EDTA, 0.5 mM  $MgCl_2$ , pH 6.4) and distributed between four slides, which  
669 had been soaked in 70% ethanol overnight and wiped clean. To each slide, fixative (4.0% (w/v) formaldehyde,  
670 3.8% (w/v) Sucrose, pH7.5) was added dropwise, followed by detergent (1% Lipsol, 0.1% Bibby Sterilin) to a  
671 ratio of 1:3:6 (suspension : fixative : detergent) before lightly mixing and incubating for 1 min at room  
672 temperature (RT). Further fixative was added dropwise to a final ratio of 1:9:6 and the mixture spread across  
673 the slide. Each spread was subsequently incubated at RT for 30 min in damp conditions, then allowed to air  
674 dry at RT overnight. Once dry, slides were sequentially washed in 0.2% (v/v) PhotoFlo Wetting Agent (Kodak)  
675 and  $dH_2O$ , and stored at 4°C.

676

677 Slides were washed once in 0.025% Triton X-100 for 10 min at RT and twice in PBS for 5 min at room  
678 temperature. Slides were blocked in 5% skimmed milk with PBS for 3 h at 37°C. Excess liquid was removed  
679 and slides laid horizontally in damp conditions. 40  $\mu$ L of primary antibody (anti-Zip3 (Shinohara et al., 2008)  
680 from rat at 1:200 and/or anti-Red1 (Genecust, affinity purified, raised against aa(426-827)) from rabbit at 1:200)  
681 in 1% skimmed milk with PBS was added under coverslips. Slides were incubated at 4°C overnight (15.5 h)  
682 and washed three times in PBS for 5 min at RT. Excess liquid was then removed and slides were returned to  
683 damp conditions. 40  $\mu$ L of secondary antibody (anti-rat AlexaFluor555 at 1:200 and anti-rabbit AlexaFluor488  
684 at 1:500) in 1% skimmed milk with PBS was added under coverslips. Slides were incubated at room  
685 temperature for 2.5 h and then washed three times with PBS for 5 min at room temperature. Cover slips were  
686 affixed using Vectashield mounting medium with DAPI, sealed with clear varnish and imaged on an Olympus  
687 IX71 ( $z = 0.2 \mu$ M, Exposure times: TRITC-mCherry = 0.2 sec, eGFP = 1.0s, DAPI = 0.1s). Images were  
688 randomised, deconvoluted via Huygens (software) and foci were automatically counted using an in-house  
689 plugin for ImageJ (FindFoci) as previously described (Herbert et al., 2014), with an appropriate mask to discard  
690 signals outside of nuclei. For Zip3 interfoci-distance scoring, pixels denoting the centre of each Zip3 focus, and  
691 Zip1 ends, were manually selected along clearly separable bivalents as determined by Zip1-GFP signal (120-  
692 156 bivalents per strain, error margin of approximately 1 pixel = 0.1  $\mu$ m). These positions were selected using  
693 the ImageJ segmented line tool and segment lengths were then calculated by macro, confirming agreement  
694 with total length as measured by ImageJ standard tool.

695

696

697

## 698 **Supplementary Discussion**

### 699 **The SK1-ML3 allele has a reduced capacity to generate CO interference**

700 As previously noted, wild type CO frequencies are higher within S96 x YJM789 than S288c x SK1 (91.4 vs  
701 74.3 COs/meiosis) (**Fig. 1b; Supplementary Table 1**). Moreover, CO distributions deviate even further from  
702 that expected for a random distribution in S96 x YJM789 ( $p < 0.01$ ; Two-sample KS test) (**Supplementary Fig.**  
703 **2a**) consistent with the ( $\gamma$ )-mixture modelling results (**Fig. 2d**) suggesting that the class I CO fraction is greater  
704 in S96 x YJM789 (75% vs. 67%). Molecular incompatibilities between certain alleles of the CO formation or  
705 CO interference machinery may account for these cross-specific differences (Al-Sweel et al., 2017). To  
706 investigate this hypothesis further, we analysed the frequency and distribution of COs within an *mlh3* $\Delta$  S288c  
707 x YJM789 background containing ectopically expressed copies of the wild-type SK1 *MLH1* and *MLH3* alleles  
708 (*SK1-MLH3*) (Al-Sweel et al., 2017). Remarkably, introduction of the SK1 alleles was sufficient to alter the  
709 genome-wide pattern of COs, producing a relative distribution identical to that observed in the S288c x SK1  
710 hybrid ( $p = 0.91$ ; Two-sample KS Test) (**Supplementary Fig. 2b**). Surprisingly, despite this change in CO  
711 distribution, introduction of the SK1 alleles did not significantly reduce CO frequency when compared to the  
712 large pool of 51 wild-type S96 x YJM789 tetrads (90.9 COs vs 91.4 per meiosis) (**Supplementary Table 1**).  
713 However, the observed frequency was significantly reduced relative to the subset ( $n=5$ ) of S96 x YJM789  
714 tetrads generated independently (100.4 vs. 90.9 COs per meiosis;  $p < 0.01$ ; Two-sample T-test; (Chen et al.,  
715 2008)). Collectively, these results suggest that, in some manner, the SK1 *MLH1* and/or *MLH3* alleles are  
716 partially deficient in class I CO formation, and/or propagation and/or sensitivity to CO interference. However,  
717 the much lower CO frequency observed within S288c x SK1 hybrids (74.3 COs per meiosis) cannot be fully  
718 ascribed to the SK1 *MLH1* and/or *MLH3* alleles alone. In the context of this study, the relative inefficiency of  
719 class I CO formation in the SK1 x S288c hybrid enhances the visibility of the *msh2* $\Delta$ -induced CO phenotype  
720 relative to in the S96 x YJM789 hybrid (**Fig. 1c-d**).

721

### 722 **Zip3 foci located at the termini of Zip1-stained synapsed axes**

723 We noted that within our microscopic analysis of synapsed chromosomes a large proportion of Zip3 foci  
724 appeared to occur at the terminal ends of Zip1 stretches (**Fig. 3c-d**). However, we suggest that this is less  
725 likely to represent disproportionate Zip3 occupancy at chromosome ends than the presence of at least some  
726 fraction of the chromosome length (i.e. telomere proximal) that is not visible in this assay—perhaps suggesting  
727 that Zip1 loading and/or polymerisation beyond the most terminal Zip3 focus is inefficient and/or destabilised  
728 during the spreading procedure. Indeed, in a similar analysis, Zhang *et al* (Zhang et al., 2014b) observed

729 telomeric LacO/LacI-GFP staining (on Chr. XV) beyond the end of the observable synaptonemal complex as  
730 stained by Zip1. Such observations are also consistent with the observations that chromosome ends  
731 disproportionately retain markers of incomplete synapsis and persistent DSB formation (Subramanian et al.,  
732 2019), and have differential compaction that is Zip1-dependent (Schalbetter et al., 2019) at this *ndt80Δ*-induced  
733 pachytene-arrest stage.

734

### 735 **Localised impact of polymorphism density upon CO formation**

736 S288c x SK1 variants have an average density of 1 per 175 bp and a median inter-variant distance of 81 bp  
737 (93.12% of inter-variant distances are <500bp) and are therefore evenly spaced and present at high density  
738 across each chromosome. Maps of polymorphism density are shown in ([Supplementary Fig. 7c-d](#)) for two  
739 example chromosomes. In general, S288c x SK1 chromosomes are organised into local peaks and troughs of  
740 variant density while maintaining overall uniformity. Therefore, it seems unlikely that inactivation of Msh2 would  
741 result in a gross-redistribution of CO formation toward any particular region of the chromosome as it may do  
742 within organisms with less uniform SNP/indel density, such as *A. thaliana* (Ziolkowski et al., 2015). To further  
743 investigate the way in which polymorphisms sculpt the meiotic landscape, we repeated the analysis shown in  
744 ([Fig. 4b-c](#)) using expanded  $\pm 1000$  bp and  $\pm 2000$  bp windows ([Supplementary Fig. 7a-b](#)). A Msh2-dependent  
745 and statistically significant skew toward regions of lower sequence divergence ( $p < 0.01$ ; Two-sample KS test)  
746 is retained at  $\pm 1000$  bp but is significantly diminished at  $\pm 2000$  bp ( $p = 0.51$ ; Two-sample KS test), suggesting  
747 that mismatched sequences have the greatest impact when present within the recombination intermediate  
748 structures.

749

### 750 **Figure legends**

#### 751 **Fig. 1 | Inactivation of Msh2 increases CO frequency and the global strength of CO interference**

752 **a**, Genome-wide mapping of recombination. Meiosis is induced within hybrid S288c x SK1 *S. cerevisiae* diploid  
753 cells and genomic material is prepped from individual, isolated spores for paired-end Illumina sequencing in  
754 order to genotype SNP/indel patterns and therefore determine the parental origin of any given loci (**Methods**).  
755 Only a single chromosome is shown for clarity. Inter-crossover distances (ICDs), a measure of the uniformity  
756 of CO distribution, are calculated as the distance (in bp) between successive COs along a given chromosome.  
757 **b**, Average number of COs per meioses for each genotype. The number of individual meioses sequenced per  
758 genotype is indicated. Error bars: 95% confidence intervals (CI). P values: Two-sample T-test. **c-f**, Empirical  
759 cumulative distribution functions (eCDFs) showing the fraction of ICDs at or below a given size. The total



760 number of experimental ICDs is indicated in brackets. ICDs are transformed (**Methods**) to correct for skews  
761 generated by differing CO frequencies. Untransformed ICD plots are available in (**Supplementary Fig. 1c-h**).  
762 Randomised datasets were generated via simulation to represent a state of no interference (**Methods**).  
763 Pairwise goodness-of-fit tests were performed between genotypes as indicated (triangular legend). P values:  
764 Two-sample KS-test.

765

## 766 **Fig. 2 | Computational modelling predicts a Msh2-dependent shift in the class I:class II CO ratio**

767 **a**, Ratio of experimentally observed ICD sizes (OBS) versus the theoretical expectation based on a single,  
768 best-fit gamma ( $\gamma$ )-distribution (EXP). Ratio values were calculated at 5 kb intervals. **b**, Example ( $\gamma$ ) mixture  
769 model ( $\alpha 1.0|\beta 1.0 + \alpha 3.0|\beta 5.0$ ). I = class I. II = class II. k datasets, owing to the existence of two CO subclasses,  
770 are a heterogenous population of three ICD types (as shown). **c**, As in (**a**) but based on a mixed ( $\gamma$ )-model (no.  
771 of distributions fitted = 2). **d**, Best-fit ( $\gamma$ ) mixture modelling results. N = sample size (total number of ICDs).  $\alpha_s$   
772 = Single-fit  $\gamma(\alpha)$  value.  $P_{(s)}$  = Fit quality of a single ( $\gamma$ )-distribution (one-sample KS-test).  $\alpha_I, \alpha_{II}$  = Mixed model  
773  $\gamma(\alpha)$  values for each class. Class I, ClassII = estimated fraction of each CO subclass. Ratio = class I:class II.  
774  $P_{(M)}$  = Fit quality of a mixed ( $\gamma$ )-mode (Two-sample KS-test) **e-f**, Estimated class I and class II CO counts  
775 respectively. Estimates were obtained using the best-fit class I:class II ratios. Total CO frequencies are overlaid  
776 (grey bar). Error bars: 95% confidence intervals. The number of individual meioses sequenced per genotype  
777 is indicated.

778

## 779 **Fig. 3 | Zip3 foci counts are neither elevated nor redistributed within Msh2-deficient cells**

780 **a**, Box-and-whisker plot showing Zip3 foci counts obtained from chromosome spreads of S288c x SK1  
781 *ndt80AR* cells prepared at 8 h following induction of meiosis (pachytene arrest). Midlines denote median  
782 values, box limits are first and third quartile, whiskers are highest/lowest values within 1.5-fold of interquartile  
783 range. P values: Two-sample T-test. **b**, Representative example for each genotype. Cells are fluorescently  
784 labelled for the meiosis-specific axis protein Zip1-GFP (green), the class I CO marker, Zip3 (red) and DNA  
785 (DAPI, blue). Only well-spread nuclei with clear Zip1 threads were analysed. Only Zip3 foci overlapping within  
786 the DAPI-stained area were counted. The total number of nuclei counted is indicated in brackets obtained from  
787 three independent experiments. **c-d**, Relative distribution of Zip3 foci along individual Zip1-GFP positive  
788 chromosome axes in *ndt80AR* and *msh2Δ ndt80AR* pachytene-arrested cells, ordered from bottom to top by  
789 increasing axis length (Green bar, measured Zip1 axis length; red dot Zip3 focus position). **e-f**, Inter-Zip3 foci  
790 distances (measured in microns) were aggregated, rank ordered, and expressed as a fraction of the total (i.e.  
791 an eCDF), equivalent to our presentation of inter-CO distances detected from octad sequencing data. In (**e**),

792 observed distributions are compared to simulations of the same number of randomly distributed foci over the  
793 same total axial distance, using four increasingly stringent merging thresholds (0.05, 0.01, 0.15, and 0.2  
794 microns; light grey to dark grey dashed lines) equivalent to approximate range of imaging resolution (1 pixel =  
795 0.1 microns). Observed distributions were not statistically dissimilar in the presence and absence of Msh2, but  
796 were significantly different from all simulated random distributions regardless of merging threshold. In (f), the  
797 observed distributions are compared to a simulated gamma distribution, that whilst still statistically dissimilar,  
798 shows a clear visual similarity. The residual deviation from an interfering gamma distribution may be caused  
799 by inherent inaccuracies in microscopy resolution, or a real characteristic of Zip3 foci as measured along  
800 spread chromosome axes.

801

#### 802 **Fig. 4 | Suppression of class I COs occurs at regions of higher sequence divergence**

803 **a**, SNP/indel count is assayed using a  $\pm 500$  bp window centred on CO or DSB hotspot midpoints. All contained  
804 SNP/indels are tallied with equal weight. **b-c**, Empirical cumulative distribution functions (eCDFs) showing the  
805 fraction of COs that reside within a region of a given SNP/indel count for S288c x SK1 (**b**) and S96 x YJM789  
806 (**c**) for the indicated hybrid strains. Expected eCDF curve (grey) is calculated using DSB hotspot midpoints  
807 (Pan et al 2011). Pairwise goodness-of-fit tests were performed between pooled *msh2* $\Delta$  and *MSH2* control  
808 datasets as indicated (triangular legend). P values: Two-sample KS-test.

809

#### 810 **Fig. 5 | Simulating impact of CO maturation failure on observed CO distributions.**

811 **a**, Extended *RecombineSim* platform as described in [Supplementary Fig. 4](#), but with the introduction of  
812 variable rates of stochastic class I CO maturation failure downstream of CO interference patterning in addition  
813 to variable fractions of randomly distributed class II COs. In this simulation, class I COs that fail to mature are  
814 still sensitive to, and still generate, localised regions of interference, but are removed from the final observed  
815 pattern of visible events. In such instances, additional COs are simulated until the final observed simulated  
816 frequency matches the frequency observed in experimental datasets. COs arising within 1.5 kb of one another  
817 are merged into a single event, again matching the way experimental datasets are processed. **b-g**, Coloured  
818 heat maps of P values (KS test) between observed and simulated CO distributions expressed as eCDF curves  
819 for the indicated strains. P values  $>0.9$  indicate good statistical fits. Each pixel represents a particular  
820 combination of parameter values: maturation failure rate (Y axis) and class II CO % (X axis). See main text  
821 and Methods for more details.

822

823

824 **Fig. 6 | Model summarising mismatch-directed suppression of class I COs**

825 **a-b**, Mismatches (jagged lines) may arise within recombination intermediates at various stages of the meiotic  
826 recombination pathway due to differences in sequence between parental information A (blue) and B (red). **c**,  
827 In the presence of a functional MMR pathway, regions of higher sequence divergence are proposed to give  
828 rise to transient heteroduplexes that cause Msh2-dependent redirection of repair toward the NCO or inter-  
829 sister outcomes. Formation of NCOs could arise via destabilisation of nascent strand-invasion intermediates,  
830 dissolution of dHJs via Sgs1-Rmi1-Top3, or disruption of CO-biased dHJ resolution (see text for more details).  
831 Concomitant repair of mismatches may additionally render some NCO events invisible, and thereby  
832 indistinguishable from inter-sister events, due to restoration of parental markers. Inactivation of MMR alleviates  
833 such repression arising within CO precursors, increasing the frequency of class I CO formation and thus the  
834 spatial uniformity within relative CO positions. In the absence of pro-class I CO factors such as Zip3, Mlh1-3  
835 and Msh4-5, class II COs can arise, but are less subject to Msh2-dependent destabilisation, perhaps due to  
836 intrinsic differences in structure, lifespan, and/or extent of heteroduplex DNA. For example, extended branch  
837 migration of Holliday junctions at class I precursors (Marsolier-Kergoat et al 2018) which may stabilise such  
838 intermediates (Ahuja et al 2021) could increase the probability of hDNA arising within them, and thereby  
839 increase Msh2-dependent redirection towards NCO outcomes.

840

841 **Supplementary Figure Legends**

842 **Supplementary Fig. 1 | CO interference is present to varying degrees within all mapped strains**

843 **a**, Empirical cumulative distribution function (eCDF) showing ICD data derived from interfering simulations  
844 ( $\gamma(\alpha) = 3.0$ ) at varying CO per cell frequencies (N). **b**, As in **(a)** but ICDs are transformed (see [Methods](#)) to  
845 correct for skews generated by differing CO frequencies. **c-h**, eCDFs showing the fraction of ICDs at or below  
846 a given size. The total number of experimental ICDs is indicated in brackets. Randomised datasets were  
847 generated via simulation to represent a state of no interference ([Methods](#)). Pairwise goodness-of-fit tests were  
848 performed between genotypes as indicated (triangular legend). P values: Two-sample KS-test.

849

850 **Supplementary Fig. 2 | Cross-specific differences—the *SK1-MLH3* allele has reduced capacity to**  
851 **mediate CO interference**

852 **a-b**, Empirical cumulative distribution functions (eCDFs) showing the fraction of ICDs at or below a given size.  
853 The total number of experimental ICDs is indicated in brackets. ICDs are transformed (see [Methods](#)) to correct  
854 for skews generated by differing CO frequencies. Randomised datasets were generated via simulation to  
855 represent a state of no interference ([Methods](#)). Pairwise goodness-of-fit tests were performed between

856 genotypes as indicated (triangular legend). A schematic of the *SK1-MLH3* strain analysed is shown. P values:  
857 Two-sample KS-test. **c**, Average number of COs per meiosis for each genotype. P values: Two-sample T-test.

858

### 859 **Supplementary Fig. 3 | Mechanistic details of MMR-dependent suppression of interfering COs**

860 **a**, Empirical cumulative distribution function (eCDF) showing the fraction of ICDs at or below a given size. The  
861 total number of experimental ICDs is indicated in brackets. ICDs are transformed (see [Methods](#)) to correct for  
862 skews generated by differing CO frequencies. Randomised datasets were generated via simulation to  
863 represent a state of no interference ([Methods](#)). Pairwise goodness-of-fit tests were performed between  
864 genotypes as indicated (triangular legend). P values: Two-sample KS-test. **b**, Average number of COs per  
865 meiosis for each genotype. The number of individual meioses sequenced per genotype is indicated. Error bars:  
866 95% confidence intervals (CI). *P values: Two-sample T-test.* **c-d**, As in **(a)** but for differing genotypes.

867

### 868 **Supplementary Fig. 4 | Modelling CO distributions.**

869 **a**, *RecombineSim* overview. Virtual chromosomes are constructed at a 100bp resolution as binned, numerical  
870 arrays upon which meiotic CO formation is simulated ([Methods](#)). Any given 100bp contains a value in the  
871 range of [0.0-1.0], designating its recombination potential (Rec(P)). Prior to CO formation, bins are initially  
872 populated with [1.0]—denoting an equal probability of class I CO formation in any given bin. During the  
873 formation of an interfering CO, *RecombineSim* imposes CO interference as a distance-dependent zone of  
874 repression by modifying Rec(P) values according to a hazard function derived from a manually specified  $\gamma(\alpha)$   
875 value, or a  $\gamma(\alpha)$  value estimated from experimental data following gamma ( $\gamma$ ) mixture modelling using  
876 maximum likelihood expectation (MLE; [Methods](#)). Such localised repression around each sequential event  
877 thus has the potential to influence the position of all subsequent interfering COs that are simulated. Non-  
878 interfering, class II COs are distributed randomly independently of Rec(P) and do not impose, nor are sensitive  
879 to, simulated CO interference. Successive events falling within a set threshold of one another (e.g. 1.5 kb) are  
880 merged into a single event residing at the midpoint position. These processes repeat until a pre-determined  
881 number of simulated ICDs are obtained. **b**, To estimate accuracy of the MLE mixture modelling algorithm, it  
882 was used to resolve and estimate individual components of simulated two component mixtures with known  
883 parameters ( $\alpha$ ,  $\beta$ ), at known weights ( $W$ )—generated via *RecombineSim*. A set of representative examples are  
884 shown. Percentage differences between actual and estimated parameters are calculated and averaged to  
885 estimate error rate (N(% $\Delta$ )) and algorithm accuracy.  $S$  = number of ICDs. **c**, Error rate (N(% $\Delta$ )) values for three  
886 ( $\gamma$ ) mixtures calculated at varying sample size ( $S$ ).

887

888 **Supplementary Fig. 5 | Specificity of anti-Zip3 antibody**

889 **a-b**, Representative chromosome spreads of control (**a**) and *zip3Δ* (**b**) cells at the approximate pachytene  
890 stage of meiosis, indicated by Zip1-GFP thread-like signals in control cells, but more punctate Zip1-GFP  
891 patterns in *zip3Δ* cells (the most complete that they become). Occasional Zip1-GFP polycomplexes were also  
892 observed (arrowhead). In *zip3Δ* cells, anti-Zip3 staining detected only background random signals arising from  
893 random binding on the slides at locations that were not enriched in the areas of spread chromatin (blue DAPI-  
894 stained signals). Scale bar =  $\mu\text{m}$

896 **Supplementary Fig 6. Detected Zip3 foci counts are positively correlated with DAPI-delimited nuclear-  
897 spread area.**

898 **a**, Scatter plot of Zip3 foci counts per cell against spread area delimited by the DAPI-positive signal for the  
899 indicated strains. R-squared correlation values are shown. **b**, Box-and-whisker plot showing Zip3 foci counts  
900 per square micron obtained from chromosome spreads of S288c x SK1 *ndt80Δ* cells prepared at 8 h following  
901 induction of meiosis (pachytene arrest). Midlines denote median values, box limits are first and third quartile,  
902 whiskers are highest/lowest values within 1.5-fold of interquartile range. P values: Two-sample T-test. The  
903 total number of nuclei counted is indicated in brackets.

905 **Supplementary Fig. 7 | Localised impact of polymorphism density upon CO formation.**

906 **a-b**, Empirical cumulative distribution functions (eCDFs) showing the fraction of COs that reside within a region  
907 ( $\pm 1000\text{bp}$  and  $\pm 2000\text{bp}$  respectively) of a given SNP/indel count (S288c x SK1 only). Expected is calculated  
908 using DSB hotspot midpoints (Pan et al 2011). Pairwise goodness-of-fit tests were performed between pooled  
909 *msh2Δ* and *MSH2*<sup>+</sup> datasets as indicated (triangular legend). P values: Two-sample KS-test. **c-d**, Example  
910 smoothed SNP/INDEL density maps per 1 kb bin in the S288c x SK1 hybrid for ChrVI and ChrVII.

912 **Supplementary Fig. 8 | Impact on simulated CO distributions of local deviations in density of  
913 heterozygosity, DSBs, and COs**

914 **a-b**, Comparison of spatial distribution of population-average densities of heterozygosity, DSB formation (Pan  
915 et al. 2011), and CO formation in wild-type and *msh2Δ* cells for four representative chromosomes binned at  
916 10 kb resolution. Although each chromosome has localised deviation from uniformity, each feature is spread  
917 relatively evenly across the length of each chromosome. **e-g**, To test the impact that localised deviations in  
918 heterozygosity (**e**), DSB formation (**f**), and observed CO density (**g**) might have on relative distributions of COs,  
919 simulations of example random (RND;  $\alpha=1$ ) and interfering (INT;  $\alpha=3$ ) gamma distributions were

920 performed as in **Supplementary Fig. 4**, but additionally weighting CO site selection by the relative amplitude  
921 of each parameter at varying levels of smoothing (0.1–25 kb). No change in distributions were observed  
922 indicating that the nonuniform distribution of these features is unable to significantly bias relative patterns of  
923 CO formation. P values reported are the minimum observed out of the five smoothing values tested for each  
924 parameter.

925

## 926 **References**

- 927 Agarwal, S., and Roeder, G. S. (2000). Zip3 provides a link between recombination enzymes and synaptonemal complex  
928 proteins. *Cell* *102*, 245-255.
- 929 Ahuja, J. S., Harvey, C. S., Wheeler, D. L., and Lichten, M. (2021). Repeated strand invasion and extensive branch  
930 migration are hallmarks of meiotic recombination. *Mol Cell* *81*, 4258-4270.e4.
- 931 Al-Sweel, N., Raghavan, V., Dutta, A., Ajith, V. P., Di Vietro, L., Khondakar, N., Manhart, C. M., Surtees, J. A., Nishant,  
932 K. T., and Alani, E. (2017). *mlh3* mutations in baker's yeast alter meiotic recombination outcomes by increasing  
933 noncrossover events genome-wide. *PLoS Genet* *13*, e1006974.
- 934 Alani, E., Lee, S., Kane, M. F., Griffith, J., and Kolodner, R. D. (1997). *Saccharomyces cerevisiae* MSH2, a mispaired  
935 base recognition protein, also recognizes Holliday junctions in DNA. *J Mol Biol* *265*, 289-301.
- 936 Allers, T., and Lichten, M. (2001). Differential timing and control of noncrossover and crossover recombination during  
937 meiosis. *Cell* *106*, 47-57.
- 938 Anderson, C. M., Oke, A., Yam, P., Zhuge, T., and Fung, J. C. (2015). Reduced Crossover Interference and Increased  
939 ZMM-Independent Recombination in the Absence of Tel1/ATM. *PLoS Genet* *11*, e1005478.
- 940 Batten, L. M., Batten, L. M., and Beutelspacher, A. (1993). *The Theory of Finite Linear Spaces* Cambridge University  
941 Press).
- 942 Baudat, F., and de Massy, B. (2007a). Regulating double-stranded DNA break repair towards crossover or non-  
943 crossover during mammalian meiosis. *Chromosome Res* *15*, 565-577.
- 944 Baudat, F., and de Massy, B. (2007b). Cis- and trans-acting elements regulate the mouse *Psmb9* meiotic recombination  
945 hotspot. *PLoS Genet* *3*, e100.
- 946 Benjamin, K. R., Zhang, C., Shokat, K. M., and Herskowitz, I. (2003). Control of landmark events in meiosis by the CDK  
947 *Cdc28* and the meiosis-specific kinase *Ime2*. *Genes Dev* *17*, 1524-1539.
- 948 Berchowitz, L. E., and Copenhaver, G. P. (2010). Genetic interference: don't stand so close to me. *Curr Genomics* *11*,  
949 91-102.
- 950 Bishop, D. K., and Zickler, D. (2004). Early decision; meiotic crossover interference prior to stable strand exchange and  
951 synapsis. *Cell* *117*, 9-15.
- 952 Blackwell, A. R., Dluzewska, J., Szymanska-Lejman, M., Desjardins, S., Tock, A. J., Kbir, N., Lambing, C., Lawrence, E.  
953 J., Bieluszewski, T., Rowan, B., Higgins, J. D., Ziolkowski, P. A., and Henderson, I. R. (2020). MSH2 shapes the meiotic  
954 crossover landscape in relation to interhomolog polymorphism in *Arabidopsis*. *EMBO J* *39*, e104858.
- 955 Bozdog, G. O., Ono, J., Denton, J. A., Karakoc, E., Hunter, N., Leu, J. Y., and Greig, D. (2021). Breaking a species  
956 barrier by enabling hybrid recombination. *Curr Biol* *31*, R180-R181.
- 957 Cannavo, E., Sanchez, A., Anand, R., Ranjha, L., Hugener, J., Adam, C., Acharya, A., Weyland, N., Aran-Guiu, X.,  
958 Charbonnier, J. B., Hoffmann, E. R., Borde, V., Matos, J., and Cejka, P. (2020). Regulation of the MLH1-MLH3  
959 endonuclease in meiosis. *Nature* *586*, 618-622.
- 960 Chambers, S. R., Hunter, N., Louis, E. J., and Borts, R. H. (1996). The mismatch repair system reduces meiotic  
961 homeologous recombination and stimulates recombination-dependent chromosome loss. *Molecular and cellular biology*  
962 *16*, 6110-6120.
- 963 Chen, S. Y., Tsubouchi, T., Rockmill, B., Sandler, J. S., Richards, D. R., Vader, G., Hochwagen, A., Roeder, G. S., and  
964 Fung, J. C. (2008). Global analysis of the meiotic crossover landscape. *Dev Cell* *15*, 401-415.
- 965 Cole, F., Keeney, S., and Jasin, M. (2010). Comprehensive, fine-scale dissection of homologous recombination  
966 outcomes at a hot spot in mouse meiosis. *Mol Cell* *39*, 700-710.
- 967 Copenhaver, G. P., Housworth, E. A., and Stahl, F. W. (2002). Crossover interference in *Arabidopsis*. *Genetics* *160*,  
968 1631-1639.

- 969 Crawford, M., Cooper, T. J., Marsolier-Kergoat, M.-C., Llorente, B., and Neale, M. J. (2018). Separable roles of the DNA  
970 damage response kinase Mec1(ATR) and its activator Rad24(RAD17) within the regulation of meiotic recombination.  
971 *bioRxiv*
- 972 de los Santos, T., Hunter, N., Lee, C., Larkin, B., Loidl, J., and Hollingsworth, N. M. (2003). The Mus81/Mms4  
973 endonuclease acts independently of double-Holliday junction resolution to promote a distinct subset of crossovers during  
974 meiosis in budding yeast. *Genetics* 164, 81-94.
- 975 Do, C. B., and Batzoglou, S. (2008). What is the expectation maximization algorithm. *Nat Biotechnol* 26, 897-899.
- 976 Engel, S. R., and Cherry, J. M. (2013). The new modern era of yeast genomics: community sequencing and the resulting  
977 annotation of multiple *Saccharomyces cerevisiae* strains at the *Saccharomyces* Genome Database. *Database (Oxford)*  
978 2013, bat012.
- 979 Falque, M., Anderson, L. K., Stack, S. M., Gauthier, F., and Martin, O. C. (2009). Two types of meiotic crossovers coexist  
980 in maize. *Plant Cell* 21, 3915-3925.
- 981 Gauthier, F., Martin, O. C., and Falque, M. (2011). CODA (crossover distribution analyzer): quantitative characterization  
982 of crossover position patterns along chromosomes. *BMC Bioinformatics* 12, 27.
- 983 Getz, T. J., Banse, S. A., Young, L. S., Banse, A. V., Swanson, J., Wang, G. M., Browne, B. L., Foss, H. M., and Stahl, F.  
984 W. (2008). Reduced mismatch repair of heteroduplexes reveals “non”-interfering crossing over in wild-type  
985 *Saccharomyces cerevisiae*. *Genetics* 178, 1251-1269.
- 986 Goldfarb, T., and Alani, E. (2005). Distinct roles for the *Saccharomyces cerevisiae* mismatch repair proteins in  
987 heteroduplex rejection, mismatch repair and nonhomologous tail removal. *Genetics* 169, 563-574.
- 988 Goldstein, A. L., and McCusker, J. H. (1999). Three new dominant drug resistance cassettes for gene disruption in  
989 *Saccharomyces cerevisiae*. *Yeast* 15, 1541-1553.
- 990 Gray, S., and Cohen, P. E. (2016). Control of Meiotic Crossovers: From Double-Strand Break Formation to Designation.  
991 *Annu Rev Genet*
- 992 Greig, D., Travisano, M., Louis, E. J., and Borts, R. H. (2003). A role for the mismatch repair system during incipient  
993 speciation in *Saccharomyces*. *J Evol Biol* 16, 429-437.
- 994 Harfe, B. D., and Jinks-Robertson, S. (2000). DNA mismatch repair and genetic instability. *Annu Rev Genet* 34, 359-399.
- 995 Henderson, K. A., and Keeney, S. (2004). Tying synaptonemal complex initiation to the formation and programmed  
996 repair of DNA double-strand breaks. *Proc Natl Acad Sci U S A* 101, 4519-4524.
- 997 Herbert, A. D., Carr, A. M., and Hoffmann, E. (2014). FindFoci: a focus detection algorithm with automated parameter  
998 training that closely matches human assignments, reduces human inconsistencies and increases speed of analysis.  
999 *PLoS One* 9, e114749.
- 1000 Holloway, J. K., Booth, J., Edlmann, W., McGowan, C. H., and Cohen, P. E. (2008). MUS81 generates a subset of  
1001 MLH1-MLH3-independent crossovers in mammalian meiosis. *PLoS Genet* 4, e1000186.
- 1002 Housworth, E. A., and Stahl, F. W. (2003). Crossover interference in humans. *Am J Hum Genet* 73, 188-197.
- 1003 Hunter, N., Chambers, S. R., Louis, E. J., and Borts, R. H. (1996). The mismatch repair system contributes to meiotic  
1004 sterility in an interspecific yeast hybrid. *The EMBO journal* 15, 1726-1733.
- 1005 Jeffreys, A. J., and Neumann, R. (2005). Factors influencing recombination frequency and distribution in a human meiotic  
1006 crossover hotspot. *Hum Mol Genet* 14, 2277-2287.
- 1007 Kane, S. M., and Roth, R. (1974). Carbohydrate metabolism during ascospore development in yeast. *J Bacteriol* 118, 8-  
1008 14.
- 1009 Kaur, H., De Muyt, A., and Lichten, M. (2015). Top3-Rmi1 DNA Single-Strand Decatenase Is Integral to the Formation  
1010 and Resolution of Meiotic Recombination Intermediates. *Molecular Cell* 57, 583-594.
- 1011 Kolodner, R. D., and Marsischky, G. T. (1999). Eukaryotic DNA mismatch repair. *Curr Opin Genet Dev* 9, 89-96.
- 1012 Kulkarni, D. S., Owens, S. N., Honda, M., Ito, M., Yang, Y., Corrigan, M. W., Chen, L., Quan, A. L., and Hunter, N.  
1013 (2020). PCNA activates the MutLγ endonuclease to promote meiotic crossing over. *Nature* 586, 623-627.
- 1014 Lam, I., and Keeney, S. (2015). Mechanism and regulation of meiotic recombination initiation. *Cold Spring Harb Perspect*  
1015 *Biol* 7, a016634.
- 1016 Langmead, B., and Salzberg, S. L. (2012). Fast gapped-read alignment with Bowtie 2. *Nat Methods* 9, 357-359.
- 1017 Li, G. M. (2008). Mechanisms and functions of DNA mismatch repair. *Cell Res* 18, 85-98.
- 1018 Li, H., Handsaker, B., Wysoker, A., Fennell, T., Ruan, J., Homer, N., Marth, G., Abecasis, G., Durbin, R., and 1000, G. P.  
1019 D. P. S. (2009). The Sequence Alignment/Map format and SAMtools. *Bioinformatics* 25, 2078-2079.
- 1020 Li, R., Bitoun, E., Altemose, N., Davies, R. W., Davies, B., and Myers, S. R. (2019). A high-resolution map of non-  
1021 crossover events reveals impacts of genetic diversity on mammalian meiotic recombination. *Nat Commun* 10, 3900.

- 1022 Longtine, M. S., McKenzie, A., Demarini, D. J., Shah, N. G., Wach, A., Brachat, A., Philippsen, P., and Pringle, J. R.  
1023 (1998). Additional modules for versatile and economical PCR-based gene deletion and modification in *Saccharomyces*  
1024 *cerevisiae*. *Yeast* *14*, 953-961.
- 1025 Lynn, A., Soucek, R., and Borner, G. V. (2007). ZMM proteins during meiosis: crossover artists at work. *Chromosome*  
1026 *Res* *15*, 591-605.
- 1027 Mancera, E., Bourgon, R., Brozzi, A., Huber, W., and Steinmetz, L. M. (2008). High-resolution mapping of meiotic  
1028 crossovers and non-crossovers in yeast. *Nature* *454*, 479-485.
- 1029 Mancera, E., Bourgon, R., Huber, W., and Steinmetz, L. M. (2011). Genome-wide survey of post-meiotic segregation  
1030 during yeast recombination. *Genome Biol* *12*, R36.
- 1031 Marsolier-Kergoat, M. C., Khan, M. M., Schott, J., Zhu, X., and Llorente, B. (2018). Mechanistic View and Genetic  
1032 Control of DNA Recombination during Meiosis. *Mol Cell* *70*, 9-20.e6.
- 1033 Martini, E., Diaz, R. L., Hunter, N., and Keeney, S. (2006). Crossover homeostasis in yeast meiosis. *Cell* *126*, 285-295.
- 1034 Martini, E., Borde, V., Legendre, M., Audic, S., Regnault, B., Soubigou, G., Dujon, B., and Llorente, B. (2011). Genome-  
1035 wide analysis of heteroduplex DNA in mismatch repair-deficient yeast cells reveals novel properties of meiotic  
1036 recombination pathways. *PLoS Genet* *7*, e1002305.
- 1037 Massey Jr, F. J. (1951). The Kolmogorov-Smirnov test for goodness of fit. *Journal of the American statistical Association*  
1038 *46*, 68-78.
- 1039 Matos, J., Blanco, M. G., Maslen, S., Skehel, J. M., and West, S. C. (2011). Regulatory control of the resolution of DNA  
1040 recombination intermediates during meiosis and mitosis. *Cell* *147*, 158-172.
- 1041 McPeck, M. S., and Speed, T. P. (1995). Modeling interference in genetic recombination. *Genetics* *139*, 1031-1044.
- 1042 Miller, L. H. (1956). Table of percentage points of Kolmogorov statistics. *Journal of the American Statistical Association*  
1043 *51*, 111-121.
- 1044 Mortimer, R. K., and Johnston, J. R. (1986). Genealogy of principal strains of the yeast genetic stock center. *Genetics*  
1045 *113*, 35-43.
- 1046 Mu, X., Murakami, H., Mohibullah, N., and Keeney, S. (2020). Chromosome-autonomous feedback down-regulates  
1047 meiotic DNA break competence upon synaptonemal complex formation. *Genes Dev* *34*, 1605-1618.
- 1048 Oh, S. D., Lao, J. P., Hwang, P. Y., Taylor, A. F., Smith, G. R., and Hunter, N. (2007). BLM ortholog, Sgs1, prevents  
1049 aberrant crossing-over by suppressing formation of multichromatid joint molecules. *Cell* *130*, 259-272.
- 1050 Oke, A., Anderson, C. M., Yam, P., and Fung, J. C. (2014). Controlling meiotic recombinational repair - specifying the  
1051 roles of ZMMs, Sgs1 and Mus81/Mms4 in crossover formation. *PLoS Genet* *10*, e1004690.
- 1052 Pan, J., Sasaki, M., Kniewel, R., Murakami, H., Blitzblau, H. G., Tischfield, S. E., Zhu, X., Neale, M. J., Jasin, M., Socci,  
1053 N. D., Hochwagen, A., and Keeney, S. (2011). A Hierarchical Combination of Factors Shapes the Genome-wide  
1054 Topography of Yeast Meiotic Recombination Initiation. *Cell* *144*, 719-731.
- 1055 Pannafino, G., and Alani, E. (2021). Coordinated and Independent Roles for MLH Subunits in DNA Repair. *Cells* *10*,
- 1056 Peterson, S. E., Keeney, S., and Jasin, M. (2020). Mechanistic Insight into Crossing over during Mouse Meiosis. *Mol Cell*  
1057 *78*, 1252-1263.e3.
- 1058 Prolla, T. A., Pang, Q., Alani, E., Kolodner, R. D., and Liskay, R. M. (1994). MLH1, PMS1, and MSH2 interactions during  
1059 the initiation of DNA mismatch repair in yeast. *Science* *265*, 1091-1093.
- 1060 Reenan, R. A., and Kolodner, R. D. (1992). Isolation and characterization of two *Saccharomyces cerevisiae* genes  
1061 encoding homologs of the bacterial HexA and MutS mismatch repair proteins. *Genetics* *132*, 963-973.
- 1062 Rogacheva, M. V., Manhart, C. M., Chen, C., Guarne, A., Surtees, J., and Alani, E. (2014). Mlh1-Mlh3, A Meiotic  
1063 Crossover and DNA Mismatch Repair Factor, is a Msh2-Msh3-Stimulated Endonuclease. *J Biol Chem*
- 1064 Sarbajna, S., Davies, D., and West, S. C. (2014). Roles of SLX1-SLX4, MUS81-EME1, and GEN1 in avoiding genome  
1065 instability and mitotic catastrophe. *Genes Dev* *28*, 1124-1136.
- 1066 Schalbetter, S. A., Fudenberg, G., Baxter, J., Pollard, K. S., and Neale, M. J. (2019). Principles of meiotic chromosome  
1067 assembly revealed in *S. cerevisiae*. *Nat Commun* *10*, 4795.
- 1068 Shinohara, M., Oh, S. D., Hunter, N., and Shinohara, A. (2008). Crossover assurance and crossover interference are  
1069 distinctly regulated by the ZMM proteins during yeast meiosis. *Nat Genet* *40*, 299-309.
- 1070 Spies, M., and Fishel, R. (2015). Mismatch repair during homologous and homeologous recombination. *Cold Spring Harb*  
1071 *Perspect Biol* *7*, a022657.
- 1072 Srivatsan, A., Bowen, N., and Kolodner, R. D. (2014). Mismatch-specific recruitment of the Mlh1-Pms1 complex identifies  
1073 repair substrates of the *Saccharomyces cerevisiae* Msh2-Msh3 complex. *J Biol Chem* *289*, 9352-9364.
- 1074 Storlazzi, A., Xu, L., Cao, L., and Kleckner, N. (1995). Crossover and noncrossover recombination during meiosis: timing  
1075 and pathway relationships. *Proc Natl Acad Sci U S A* *92*, 8512-8516.



- 1076 Subramanian, V. V., Zhu, X., Markowitz, T. E., Vale-Silva, L. A., San-Segundo, P. A., Hollingsworth, N. M., Keeney, S.,  
1077 and Hochwagen, A. (2019). Persistent DNA-break potential near telomeres increases initiation of meiotic recombination  
1078 on short chromosomes. *Nat Commun* 10, 970.
- 1079 Sugawara, N., Goldfarb, T., Studamire, B., Alani, E., and Haber, J. E. (2004). Heteroduplex rejection during single-strand  
1080 annealing requires Sgs1 helicase and mismatch repair proteins Msh2 and Msh6 but not Pms1. *Proc Natl Acad Sci U S A*  
1081 101, 9315-9320.
- 1082 Tang, S., Wu, M., Zhang, R., and Hunter, N. (2015). Pervasive and Essential Roles of the Top3-Rmi1 Decatenase  
1083 Orchestrate Recombination and Facilitate Chromosome Segregation in Meiosis. *Molecular Cell* 57, 607-621.
- 1084 Thacker, D., Mohibullah, N., Zhu, X., and Keeney, S. (2014). Homologue engagement controls meiotic DNA break  
1085 number and distribution. *Nature* 510, 241-246.
- 1086 Van der Auwera, G. A., Carneiro, M. O., Hartl, C., Poplin, R., Del Angel, G., Levy-Moonshine, A., Jordan, T., Shakir, K.,  
1087 Roazen, D., Thibault, J., Banks, E., Garimella, K. V., Altshuler, D., Gabriel, S., and DePristo, M. A. (2013). From FastQ  
1088 data to high confidence variant calls: the Genome Analysis Toolkit best practices pipeline. *Curr Protoc Bioinformatics* 43,  
1089 11.10.1-33.
- 1090 Wang, S., Hassold, T., Hunt, P., White, M. A., Zickler, D., Kleckner, N., and Zhang, L. (2017). Inefficient Crossover  
1091 Maturation Underlies Elevated Aneuploidy in Human Female Meiosis. *Cell* 168, 977-989.e17.
- 1092 White, E. J., Cowan, C., Cande, W. Z., and Kaback, D. B. (2004). In vivo analysis of synaptonemal complex formation  
1093 during yeast meiosis. *Genetics* 167, 51-63.
- 1094 Xu, L., Ajimura, M., Padmore, R., Klein, C., and Kleckner, N. (1995). NDT80, a meiosis-specific gene required for exit  
1095 from pachytene in *Saccharomyces cerevisiae*. *Mol Cell Biol* 15, 6572-6581.
- 1096 Zakharyevich, K., Tang, S., Ma, Y., and Hunter, N. (2012). Delineation of joint molecule resolution pathways in meiosis  
1097 identifies a crossover-specific resolvase. *Cell* 149, 334-347.
- 1098 Zhai, J., and Hingorani, M. M. (2010). *Saccharomyces cerevisiae* Msh2-Msh6 DNA binding kinetics reveal a mechanism  
1099 of targeting sites for DNA mismatch repair. *Proc Natl Acad Sci U S A* 107, 680-685.
- 1100 Zhang, L., Liang, Z., Hutchinson, J., and Kleckner, N. (2014a). Crossover patterning by the beam-film model: analysis  
1101 and implications. *PLoS Genet* 10, e1004042.
- 1102 Zhang, L., Wang, S., Yin, S., Hong, S., Kim, K. P., and Kleckner, N. (2014b). Topoisomerase II mediates meiotic  
1103 crossover interference. *Nature* 511, 551-556.
- 1104 Ziolkowski, P. A., Berchowitz, L. E., Lambing, C., Yelina, N. E., Zhao, X., Kelly, K. A., Choi, K., Ziolkowska, L., June, V.,  
1105 Sanchez-Moran, E., Franklin, C., Copenhaver, G. P., and Henderson, I. R. (2015). Juxtaposition of heterozygous and  
1106 homozygous regions causes reciprocal crossover remodelling via interference during *Arabidopsis* meiosis. *Elife* 4,  
1107  
1108  
1109

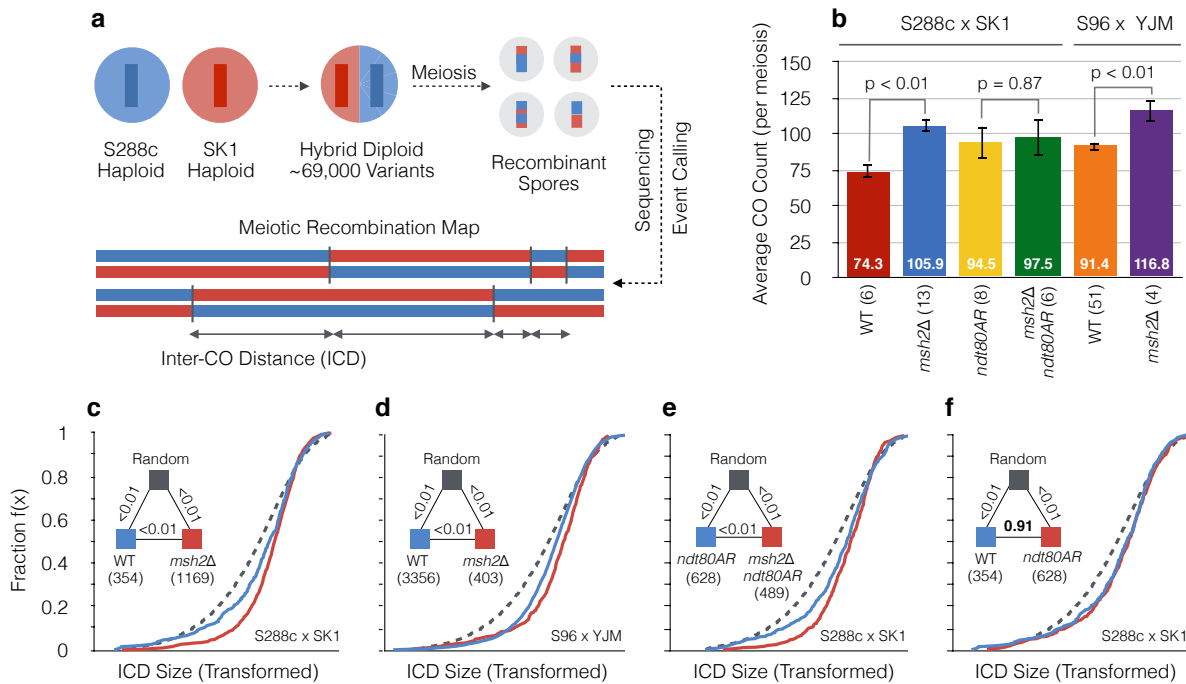

**Fig. 1 | Inactivation of Msh2 increases CO frequency and the global strength of CO interference**

**a**, Genome-wide mapping of recombination. Meiosis is induced within hybrid S288c x SK1 *S. cerevisiae* diploid cells and genomic material is prepped from individual, isolated spores for paired-end Illumina sequencing in order to genotype SNP/indel patterns and therefore determine the parental origin of any given loci (**Methods**). Only a single chromosome is shown for clarity. Inter-crossover distances (ICDs), a measure of the uniformity of CO distribution, are calculated as the distance (in bp) between successive COs along a given chromosome. **b**, Average number of COs per meiosis for each genotype. The number of individual meioses sequenced per genotype is indicated. Error bars: 95% confidence intervals (CI). P values: Two-sample T-test. **c-f**, Empirical cumulative distribution functions (eCDFs) showing the fraction of ICDs at or below a given size. The total number of experimental ICDs is indicated in brackets. ICDs are transformed (**Methods**) to correct for skews generated by differing CO frequencies. Untransformed ICD plots are available in (**Supplementary Fig. 1c-h**). Randomised datasets were generated via simulation to represent a state of no interference (**Methods**). Pairwise goodness-of-fit tests were performed between genotypes as indicated (triangular legend). P values: Two-sample KS-test.

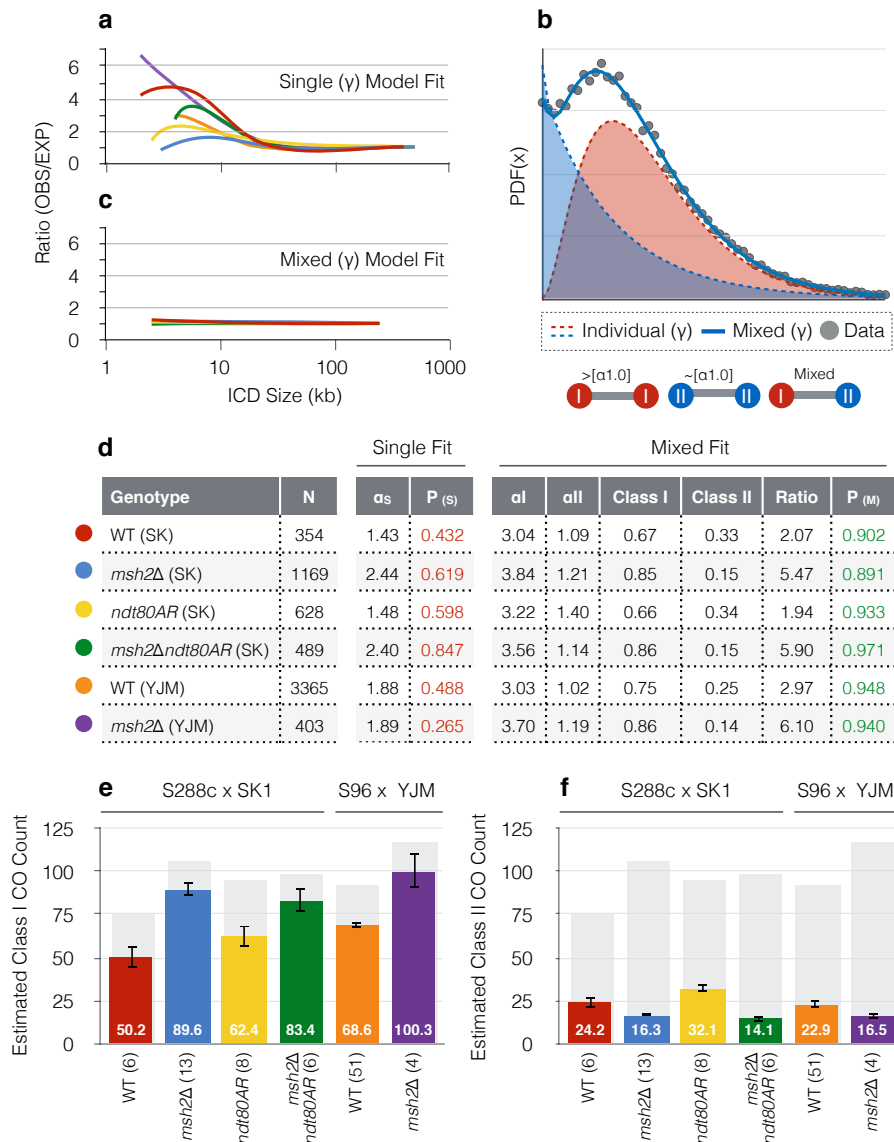

**Fig. 2 | Computational modelling predicts a Msh2-dependent shift in the class I:class II CO ratio**

**a**, Ratio of experimentally observed ICD sizes (OBS) versus the theoretical expectation based on a single, best-fit gamma ( $\gamma$ )-distribution (EXP). Ratio values were calculated at 5 kb intervals. **b**, Example ( $\gamma$ ) mixture model ( $\alpha 1.0|\beta 1.0 + \alpha 3.0|\beta 5.0$ ). I = class I. II = class II.  $k$  datasets, owing to the existence of two CO subclasses, are a heterogeneous population of three ICD types (as shown). **c**, As in **(a)** but based on a mixed ( $\gamma$ )-model (no. of distributions fitted = 2). **d**, Best-fit ( $\gamma$ ) mixture modelling results. N = sample size (total number of ICDs).  $\alpha_s$  = Single-fit  $\gamma(\alpha)$  value.  $P_{(s)}$  = Fit quality of a single ( $\gamma$ )-distribution (one-sample KS-test).  $\alpha_I$ ,  $\alpha_{II}$  = Mixed model  $\gamma(\alpha)$  values for each class. Class I, ClassII = estimated fraction of each CO subclass. Ratio = class I:class II.  $P_{(M)}$  = Fit quality of a mixed ( $\gamma$ )-mode (Two-sample KS-test) **e-f**, Estimated class I and class II CO counts respectively. Estimates were obtained using the best-fit class I:class II ratios. Total CO frequencies are overlaid (grey bar). Error bars: 95% confidence intervals. The number of individual meioses sequenced per genotype is indicated.

**FIGURE 2**

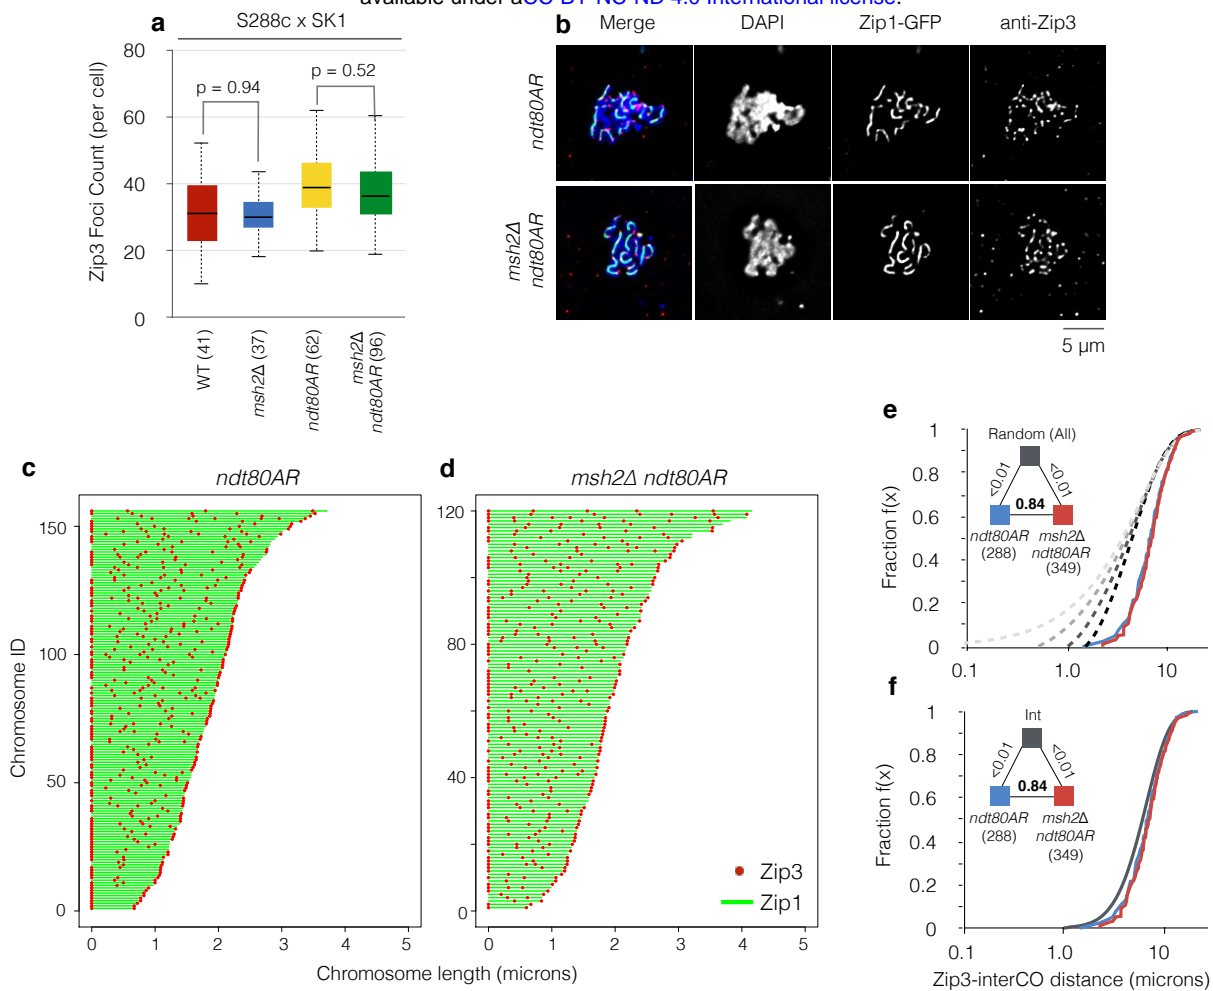

**Fig. 3 | Zip3 foci counts are neither elevated nor redistributed within Msh2-deficient cells**

**a**, Box-and-whisker plot showing Zip3 foci counts obtained from chromosome spreads of S288c x SK1 *ndt80AR* cells prepared at 8 h following induction of meiosis (pachytene arrest). Midlines denote median values, box limits are first and third quartile, whiskers are highest/lowest values within 1.5-fold of interquartile range. P values: Two-sample T-test. **b**, Representative example for each genotype. Cells are fluorescently labelled for the meiosis-specific axis protein Zip1-GFP (green), the class I CO marker, Zip3 (red) and DNA (DAPI, blue). Only well-spread nuclei with clear Zip1 threads were analysed. Only Zip3 foci overlapping within the DAPI-stained area were counted. The total number of nuclei counted is indicated in brackets obtained from three independent experiments. **c-d**, Relative distribution of Zip3 foci along individual Zip1-GFP positive chromosome axes in *ndt80AR* and *msh2Δ ndt80AR* pachytene-arrested cells, ordered from bottom to top by increasing axis length (Green bar, measured Zip1 axis length; red dot Zip3 focus position). **e-f**, Inter-Zip3 foci distances (measured in microns) were aggregated, rank ordered, and expressed as a fraction of the total (i.e. an eCDF), equivalent to our presentation of inter-CO distances detected from octad sequencing data. In **(e)**, observed distributions are compared to simulations of the same number of randomly distributed foci over the same total axial distance, using four increasingly stringent merging thresholds (0.05, 0.01, 0.15, and 0.2 microns; light grey to dark grey dashed lines) equivalent to approximate range of imaging resolution (1 pixel = 0.1 microns). Observed distributions were not statistically dissimilar in the presence and absence of Msh2, but were significantly different from all simulated random distributions regardless of merging threshold. In **(f)**, the observed distributions are compared to a simulated gamma distribution, that whilst still statistically dissimilar, shows a clear visual similarity. The residual deviation from an interfering gamma distribution may be caused by inherent inaccuracies in microscopy resolution, or a real characteristic of Zip3 foci as measured along spread chromosome axes.

**FIGURE 3**

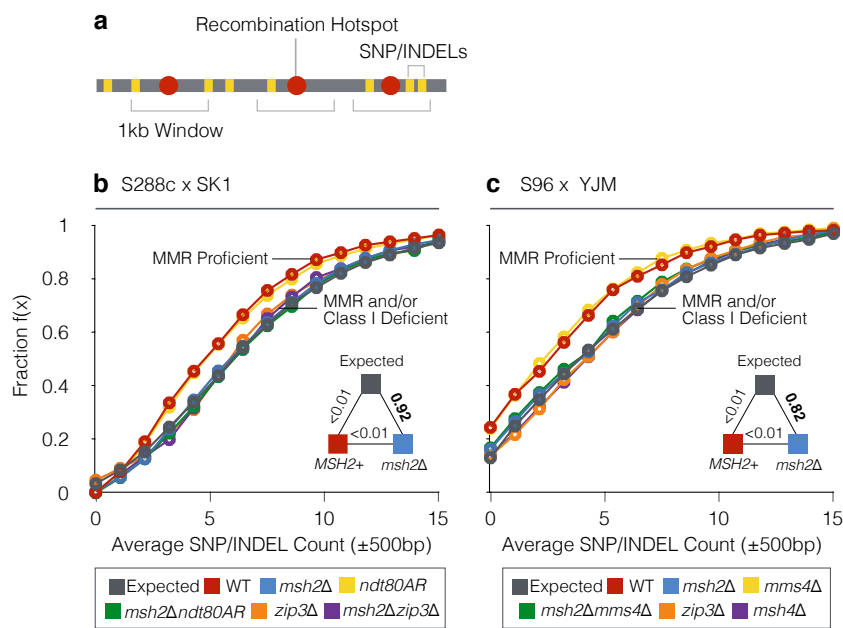

**Fig. 4 | Suppression of class I COs occurs at regions of higher sequence divergence**

**a**, SNP/indel count is assayed using a  $\pm 500$  bp window centred on CO or DSB hotspot midpoints. All contained SNP/indels are tallied with equal weight. **b-c**, Empirical cumulative distribution functions (eCDFs) showing the fraction of COs that reside within a region of a given SNP/indel count for S288c x SK1 (**b**) and S96 x YJM789 (**c**) for the indicated hybrid strains. Expected eCDF curve (grey) is calculated using DSB hotspot midpoints (Pan et al 2011). Pairwise goodness-of-fit tests were performed between pooled *msh2Δ* and *MSH2* control datasets as indicated (triangular legend). P values: Two-sample KS-test.

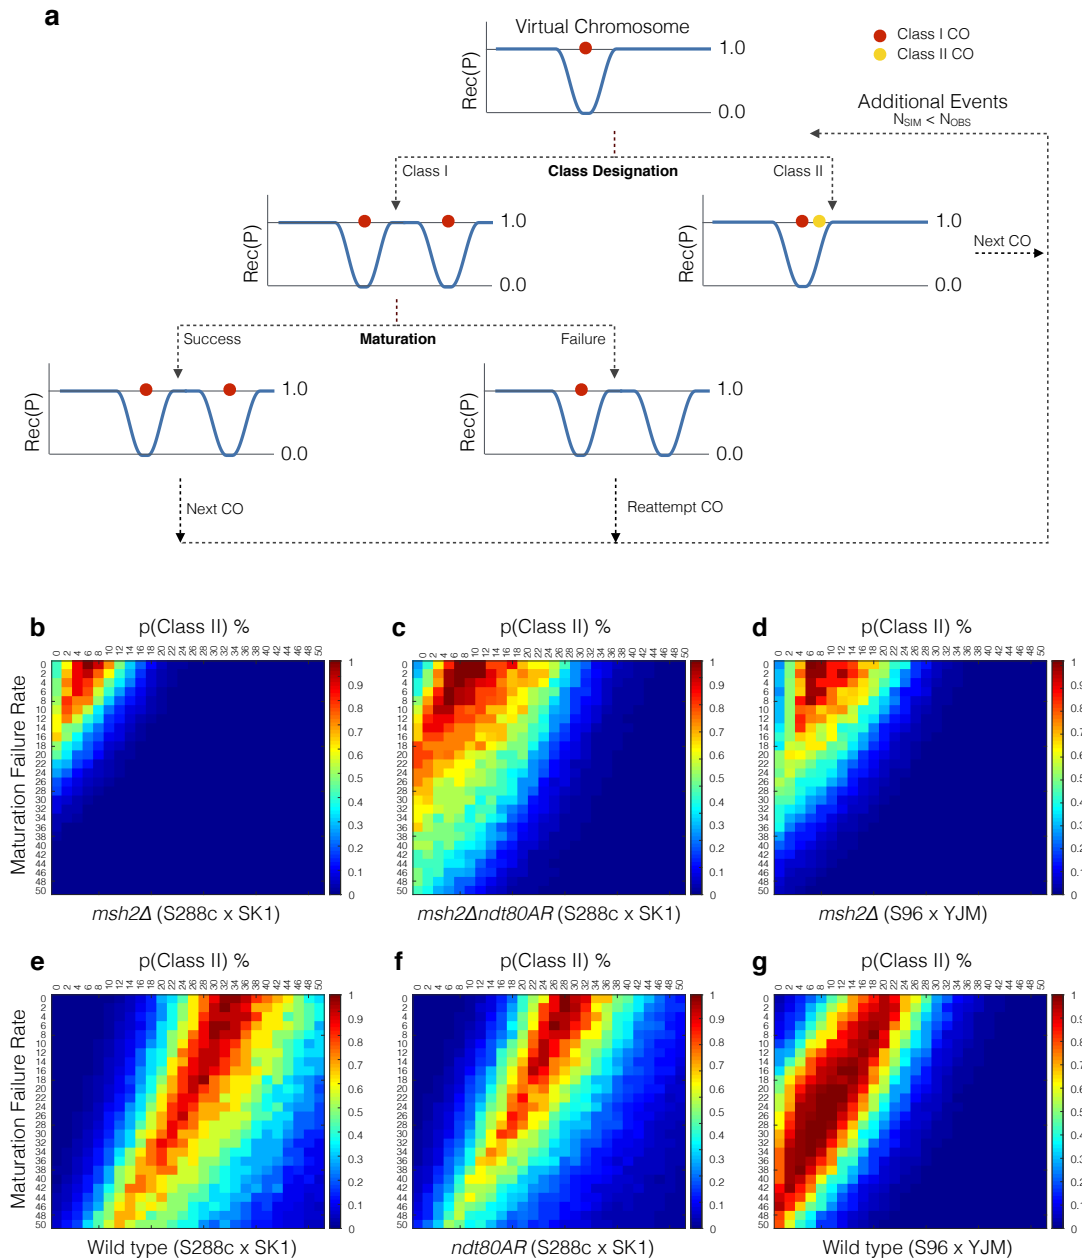

**Fig. 5 | Simulating impact of CO maturation failure on observed CO distributions.**

**a**, Extended *RecombineSim* platform as described in [Supplementary Fig. 4](#), but with the introduction of variable rates of stochastic class I CO maturation failure downstream of CO interference patterning in addition to variable fractions of randomly distributed class II COs. In this simulation, class I COs that fail to mature are still sensitive to, and still generate, localised regions of interference, but are removed from the final observed pattern of visible events. In such instances, additional COs are simulated until the final observed simulated frequency matches the frequency observed in experimental datasets. COs arising within 1.5 kb of one another are merged into a single event, again matching the way experimental datasets are processed. **b-g**, Coloured heat maps of P values (KS test) between observed and simulated CO distributions expressed as eCDF curves for the indicated strains. P values  $>0.9$  indicate good statistical fits. Each pixel represents a particular combination of parameter values: maturation failure rate (Y axis) and class II CO % (X axis). See main text and Methods for more details.

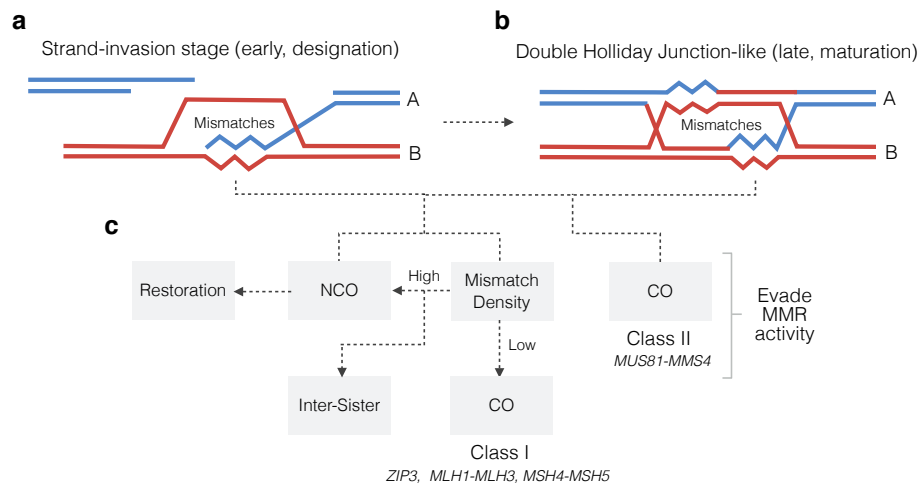

**Fig. 6 | Model summarising mismatch-directed suppression of class I COs**

**a-b**, Mismatches (jagged lines) may arise within recombination intermediates at various stages of the meiotic recombination pathway due to differences in sequence between parental information A (blue) and B (red). **c**, In the presence of a functional MMR pathway, regions of higher sequence divergence are proposed to give rise to transient heteroduplexes that cause Msh2-dependent redirection of repair toward the NCO or inter-sister outcomes. Formation of NCOs could arise via destabilisation of nascent strand-invasion intermediates, dissolution of dHJs via Sgs1-Rmi1-Top3, or disruption of CO-biased dHJ resolution (see text for more details). Concomitant repair of mismatches may additionally render some NCO events invisible, and thereby indistinguishable from inter-sister events, due to restoration of parental markers. Inactivation of MMR alleviates such repression arising within CO precursors, increasing the frequency of class I CO formation and thus the spatial uniformity of relative CO positions. In the absence of pro-class I CO factors such as Zip3, Mlh1-3 and Msh4-5, class II COs can arise, but are less subject to Msh2-dependent destabilisation, perhaps due to intrinsic differences in structure, lifespan, and/or extent of heteroduplex DNA. For example, extended branch migration of Holliday junctions at class I precursors (Marsolier-Kergoat et al 2018) which may stabilise such intermediates (Ahuja et al 2021) could increase the probability of hDNA arising within them, and thereby increase Msh2-dependent redirection towards NCO outcomes.

## Supplementary Figures



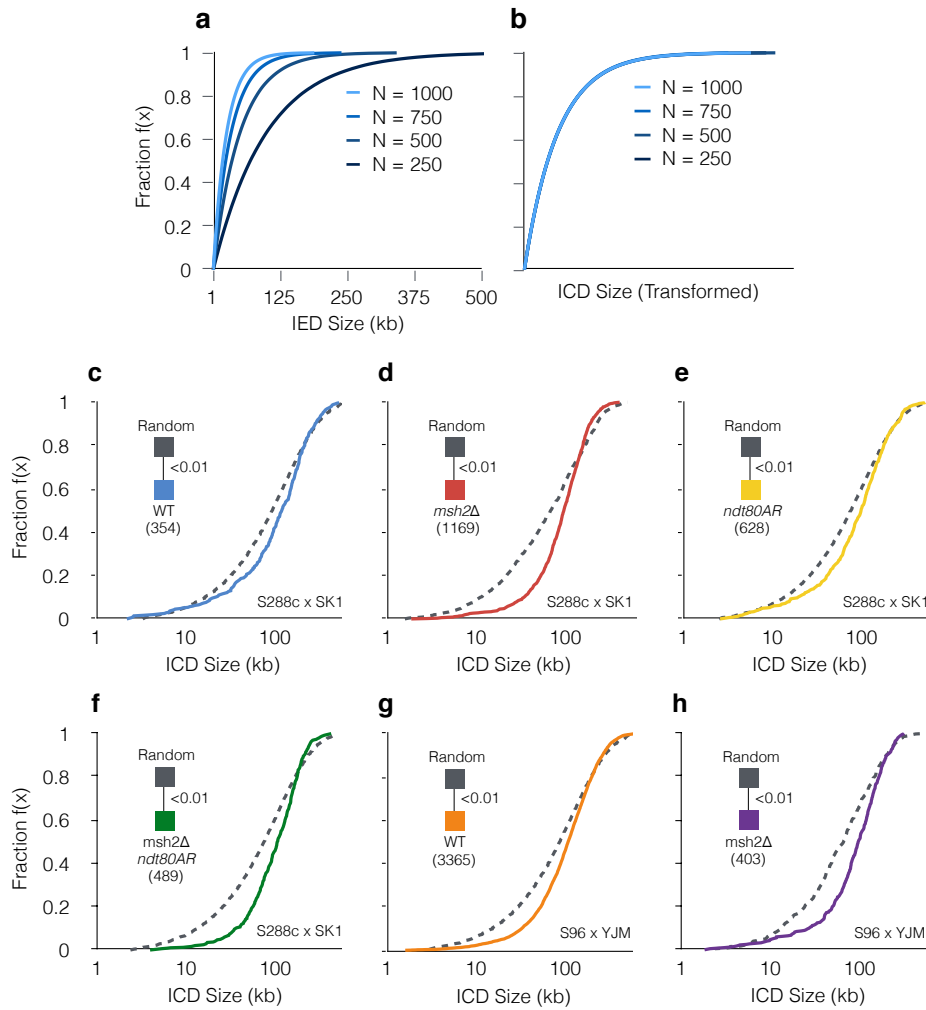

**Supplementary Fig. 1 | CO interference is present to varying degrees within all mapped strains**

**a**, Empirical cumulative distribution function (eCDF) showing ICD data derived from interfering simulations ( $\gamma(\alpha) = 3.0$ ) at varying CO per cell frequencies ( $N$ ). **b**, As in **(a)** but ICDs are transformed (see **Methods**) to correct for skews generated by differing CO frequencies. **c-h**, eCDFs showing the fraction of ICDs at or below a given size. The total number of experimental ICDs is indicated in brackets. Randomised datasets were generated via simulation to represent a state of no interference (**Methods**). Pairwise goodness-of-fit tests were performed between genotypes as indicated (triangular legend). P values: Two-sample KS-test.

**FIGURE S1**

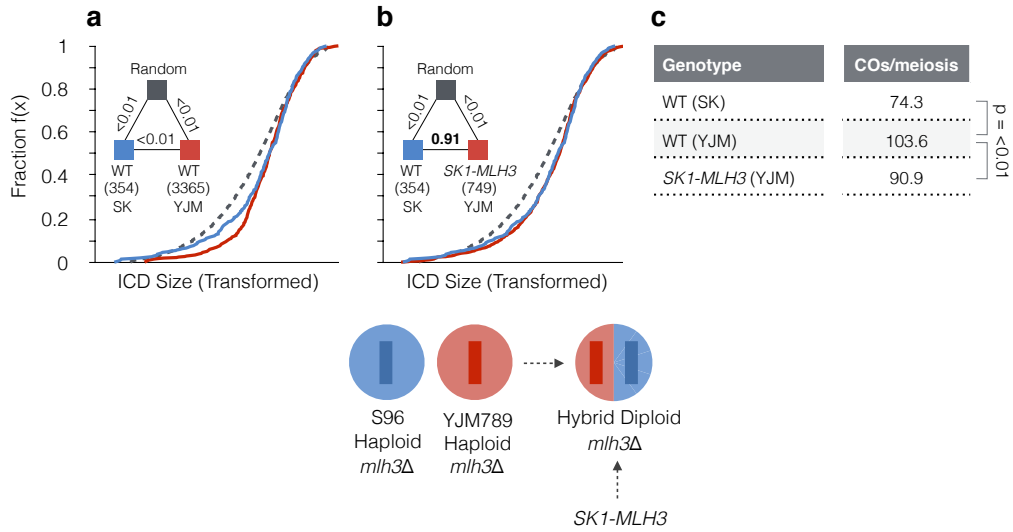

**Supplementary Fig. 2 | Cross-specific differences—the SK1-MLH3 allele has reduced capacity to mediate CO interference**

**a-b**, Empirical cumulative distribution functions (eCDFs) showing the fraction of ICDs at or below a given size. The total number of experimental ICDs is indicated in brackets. ICDs are transformed (see **Methods**) to correct for skews generated by differing CO frequencies. Randomised datasets were generated via simulation to represent a state of no interference (**Methods**). Pairwise goodness-of-fit tests were performed between genotypes as indicated (triangular legend). A schematic of the SK1-MLH3 strain analysed is shown.

P values: Two-sample KS-test. **c**, Average number of COs per meiosis for each genotype. P values: Two-sample T-test.

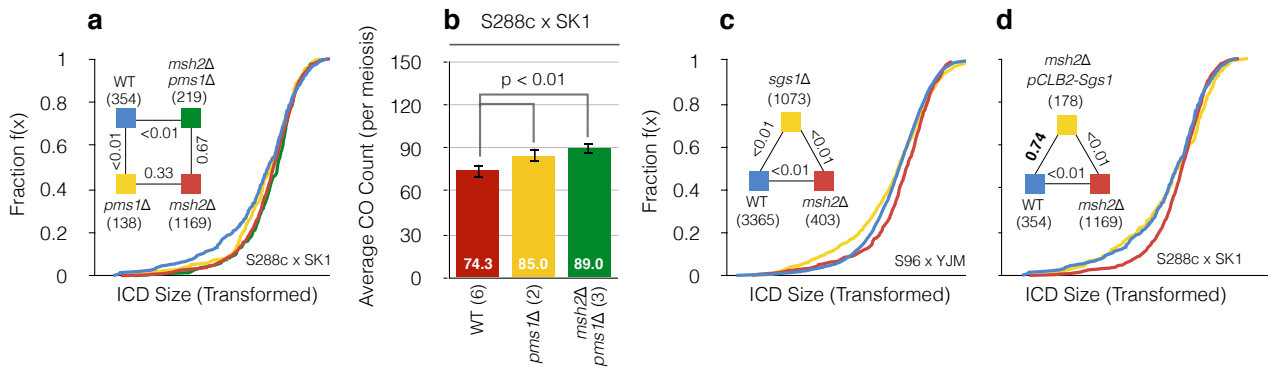

### Supplementary Fig. 3 | Mechanistic details of MMR-dependent suppression of interfering COs

**a**, Empirical cumulative distribution function (eCDF) showing the fraction of ICDs at or below a given size. The total number of experimental ICDs is indicated in brackets. ICDs are transformed (see **Methods**) to correct for skews generated by differing CO frequencies. Randomised datasets were generated via simulation to represent a state of no interference (**Methods**). Pairwise goodness-of-fit tests were performed between genotypes as indicated (triangular legend). P values: Two-sample KS-test. **b**, Average number of COs per meiosis for each genotype. The number of individual meioses sequenced per genotype is indicated. Error bars: 95% confidence intervals (CI). P values: Two-sample T-test. **c-d**, As in **(a)** but for differing genotypes.

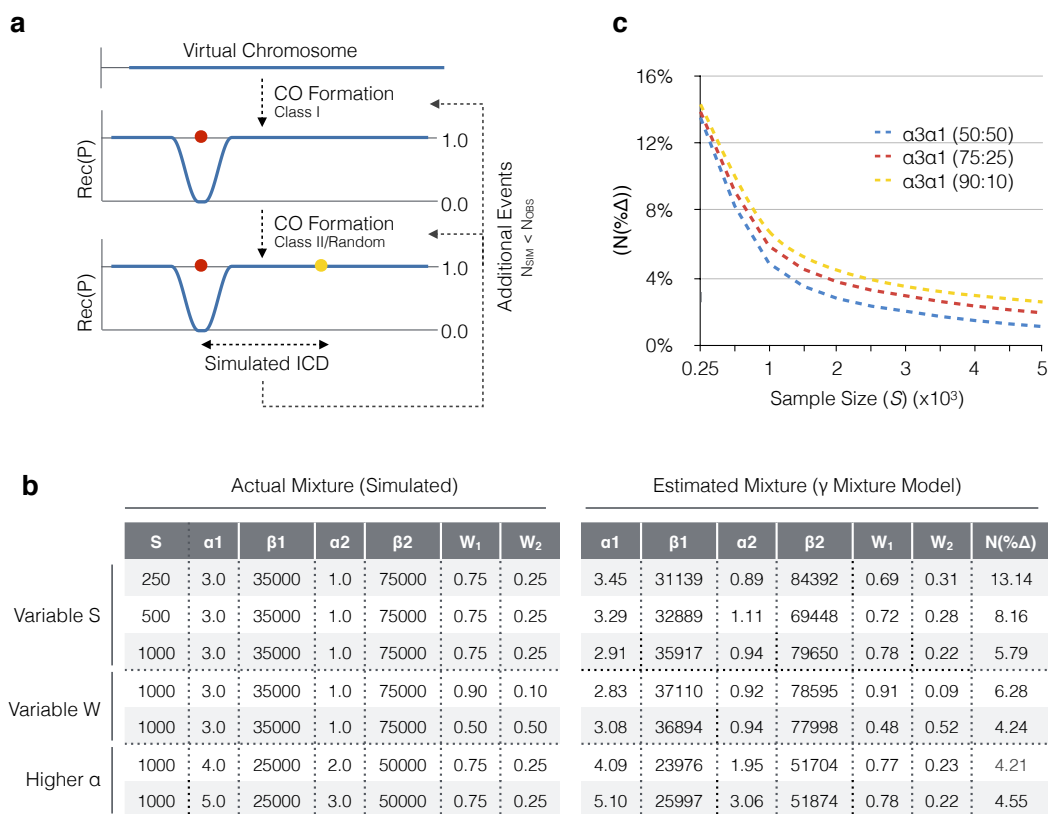

#### Supplementary Fig. 4 | Modelling CO distributions.

**a**, *RecombineSim* overview. Virtual chromosomes are constructed at a 100bp resolution as binned, numerical arrays upon which meiotic CO formation is simulated (Methods). Any given 100bp contains a value in the range of [0.0-1.0], designating its recombination potential (Rec(P)). Prior to CO formation, bins are initially populated with [1.0]—denoting an equal probability of class I CO formation in any given bin. During the formation of an interfering CO, *RecombineSim* imposes CO interference as a distance-dependent zone of repression by modifying Rec(P) values according to a hazard function derived from a manually specified  $\gamma(\alpha)$  value, or a  $\gamma(\alpha)$  value estimated from experimental data following gamma ( $\gamma$ ) mixture modelling using maximum likelihood expectation (MLE; Methods). Such localised repression around each sequential event thus has the potential to influence the position of all subsequent interfering COs that are simulated. Non-interfering, class II COs are distributed randomly independently of Rec(P) and do not impose, nor are sensitive to, simulated CO interference. Successive events falling within a set threshold of one another (e.g. 1.5 kb) are merged into a single event residing at the midpoint position. These processes repeat until a pre-determined number of simulated ICDs are obtained. **b**, To estimate accuracy of the MLE mixture modelling algorithm, it was used to resolve and estimate individual components of simulated two component mixtures with known parameters ( $\alpha, \beta$ ), at known weights ( $W$ )—generated via *RecombineSim*. A set of representative examples are shown. Percentage differences between actual and estimated parameters are calculated and averaged to estimate error rate (N(% $\Delta$ )) and algorithm accuracy. S = number of ICDs. **c**, Error rate (N(% $\Delta$ )) values for three ( $\gamma$ ) mixtures calculated at varying sample size (S).

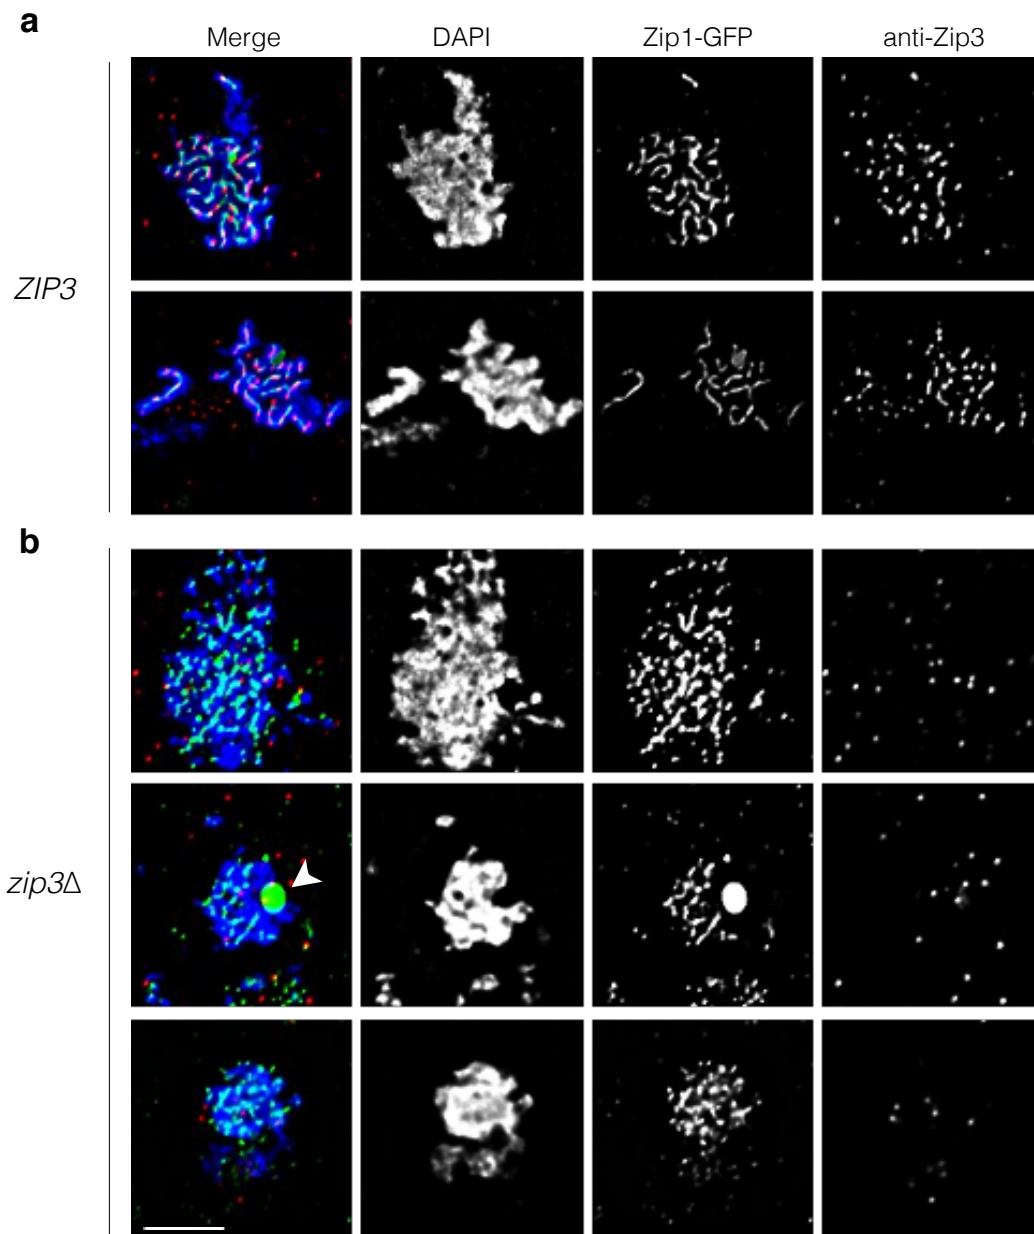

**Supplementary Fig. 5 | Specificity of anti-Zip3 antibody**

**a-b**, Representative chromosome spreads of control (**a**) and *zip3Δ* (**b**) cells at the approximate pachytene stage of meiosis, indicated by Zip1-GFP thread-like signals in control cells, but more punctate Zip1-GFP patterns in *zip3Δ* cells (the most complete that they become). Occasional Zip1-GFP polycomplexes were also observed (arrowhead). In *zip3Δ* cells, anti-Zip3 staining detected only background random signals arising from random binding on the slides at locations that were not enriched in the areas of spread chromatin (blue DAPI-stained signals). Scale bar =  $\mu\text{m}$

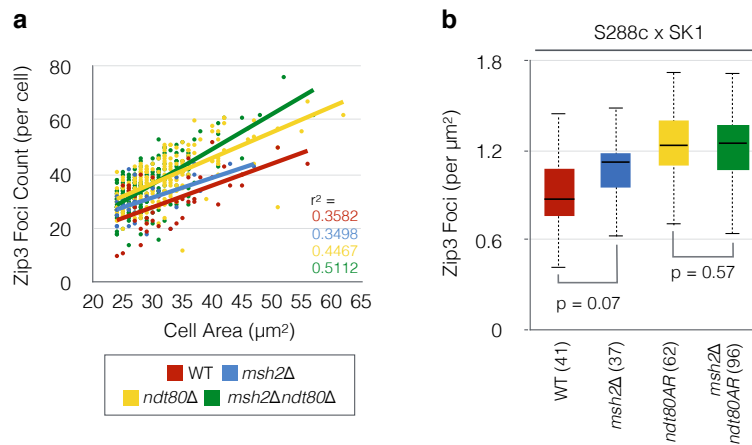

**Supplementary Fig 6. Detected Zip3 foci counts are positively correlated with DAPI-delimited nuclear-spread area.**

**a**, Scatter plot of Zip3 foci counts per cell against spread area delimited by the DAPI-positive signal for the indicated strains. R-squared correlation values are shown. **b**, Box-and-whisker plot showing Zip3 foci counts per square micron obtained from chromosome spreads of S288c x SK1 *ndt80* $\Delta$  cells prepared at 8 h following induction of meiosis (pachytene arrest). Midlines denote median values, box limits are first and third quartile, whiskers are highest/lowest values within 1.5-fold of interquartile range. P values: Two-sample T-test. The total number of nuclei counted is indicated in brackets.

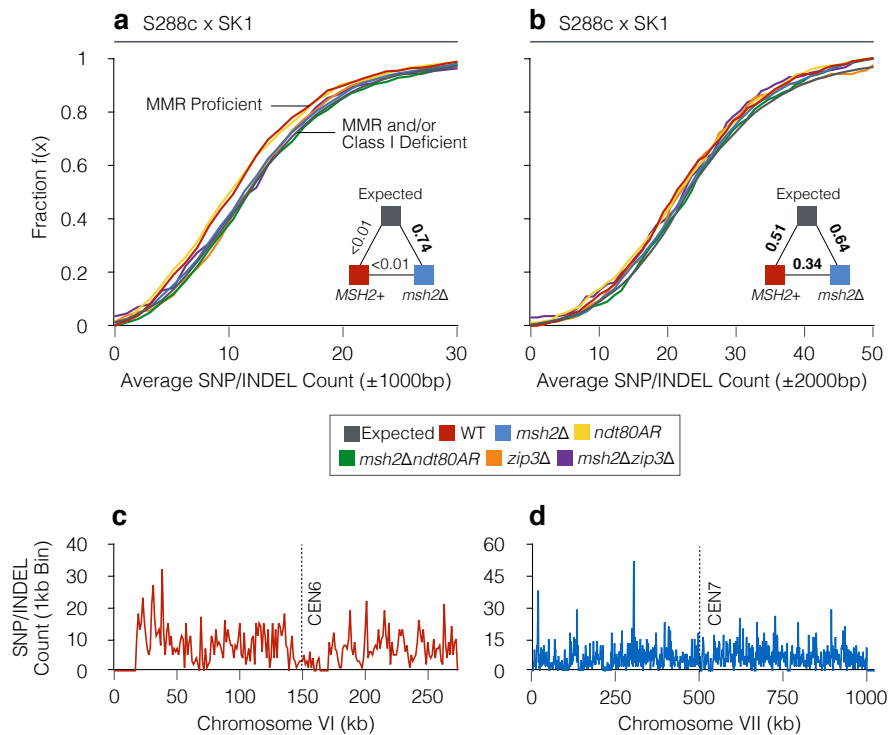

**Supplementary Fig. 7 | Localised impact of polymorphism density upon CO formation.**

**a-b**, Empirical cumulative distribution functions (eCDFs) showing the fraction of COs that reside within a region ( $\pm 1000$ bp and  $\pm 2000$ bp respectively) of a given SNP/indel count (S288c x SK1 only). Expected is calculated using DSB hotspot midpoints (Pan et al 2011). Pairwise goodness-of-fit tests were performed between pooled  $msh2\Delta$  and  $MSH2^+$  datasets as indicated (triangular legend). P values: Two-sample KS-test. **c-d**, Example smoothed SNP/INDEL density maps per 1 kb bin in the S288c x SK1 hybrid for ChrVI and ChrVII.

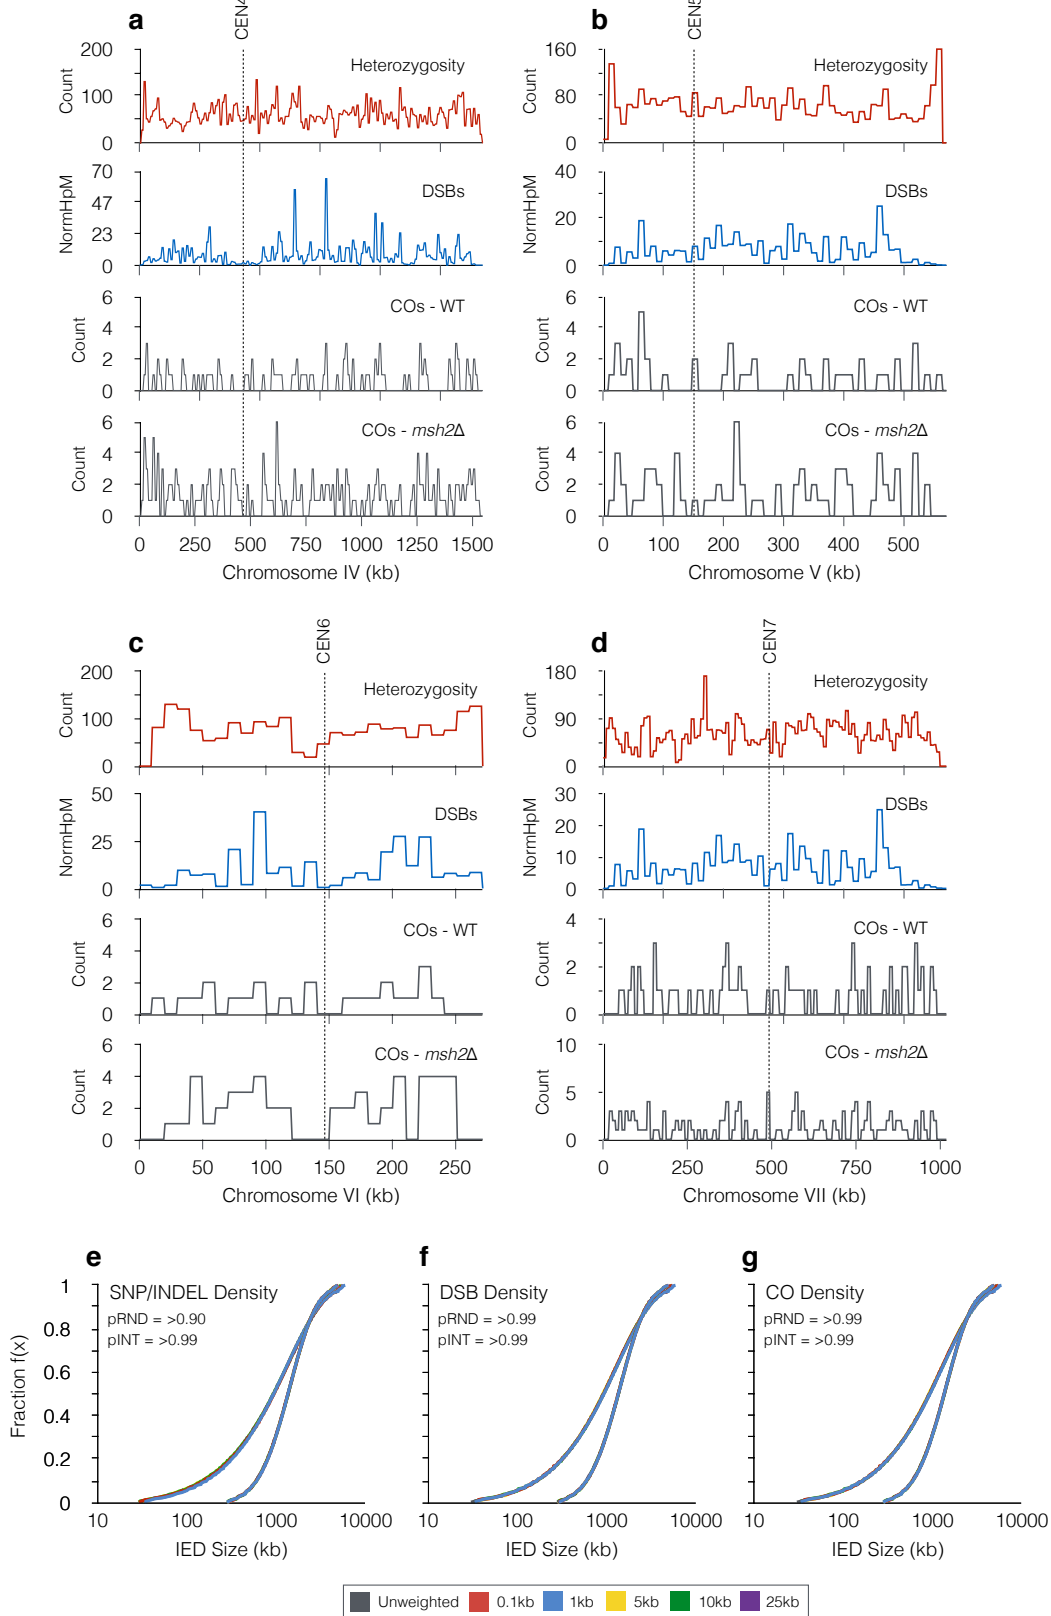

**Supplementary Fig. 8 | Impact on simulated CO distributions of local deviations in density of heterozygosity, DSBs, and COs**

**a-b**, Comparison of spatial distribution of population-average densities of heterozygosity, DSB formation (Pan et al. 2011), and CO formation in wild-type and *msh2Δ* cells for four representative chromosomes binned at 10 kb resolution. Although each chromosome has localised deviation from uniformity, each feature is spread relatively evenly across the length of each chromosome. **e-g**, To test the impact that localised deviations in heterozygosity (**e**), DSB formation (**f**), and observed CO density (**g**) might have on relative distributions of COs, simulations of example random (RND;  $\alpha=1$ ) and interfering (INT;  $\alpha=3$ ) gamma distributions were performed as in **Supplementary Fig. 4**, but additionally weighting CO site selection by the relative amplitude of each parameter at varying levels of smoothing (0.1–25 kb). No change in distributions were observed indicating that the nonuniform distribution of these features is unable to significantly bias relative patterns of CO formation. P values reported are the minimum observed out of the five smoothing values tested for each parameter.



| Relevant genotype                 | Hybrid       | Meioses analysed | Total COs | Total NCOs | COs per meiosis | NCOs per meiosis | ICDs | Source                          |
|-----------------------------------|--------------|------------------|-----------|------------|-----------------|------------------|------|---------------------------------|
| Wild type                         | SK1 x S288c  | 6                | 446       | 185        | 74.3            | 30.8             | 354  | Crawford et al 2019; This study |
| <i>msh2Δ</i>                      | SK1 x S288c  | 13               | 1377      | 1206       | 105.9           | 92.8             | 1169 | Crawford et al 2019; This study |
| <i>ndt80AR</i>                    | SK1 x S288c  | 8                | 756       | 391        | 94.5            | 48.9             | 628  | Crawford et al 2019; This study |
| <i>ndt80AR msh2Δ</i>              | SK1 x S288c  | 6                | 585       | 521        | 97.5            | 86.8             | 489  | Crawford et al 2019; This study |
| <i>zip3Δ</i>                      | SK1 x S288c  | 4                | 187       | 344        | 46.8            | 86.0             | 153  | Crawford et al 2019; This study |
| <i>msh2Δ zip3Δ</i>                | SK1 x S288c  | 4                | 104       | 1356       | 26.0            | 339.0            | 75   | Crawford et al 2019; This study |
| <i>pms1Δ</i>                      | SK1 x S288c  | 2                | 170       | 234        | 85.0            | 117.0            | 138  | Marsolier-Kergoat et al. 2018   |
| <i>pms1Δ msh2Δ</i>                | SK1 x S288c  | 3                | 267       | 236        | 89.0            | 78.7             | 219  | Marsolier-Kergoat et al. 2018   |
| <i>P<sub>CLB2</sub>sgs1 msh2Δ</i> | SK1 x S288c  | 2                | 219       | 183        | 109.5           | 91.5             | 178  | Marsolier-Kergoat et al. 2018   |
| Wild type                         | S96 x YJM789 | 5                | 502       | 261        | 100.4           | 52.2             | 422  | Chen et al 2008                 |
| Wild type                         | S96 x YJM789 | 46               | 4161      | 2128       | 90.5            | 46.3             | 3425 | Steinmetz                       |
| Pooled wild type                  | S96 x YJM789 | 51               | 4663      | 2389       | 91.4            | 46.8             | 3365 |                                 |
| <i>msh2Δ</i>                      | S96 x YJM789 | 4                | 467       | 225        | 116.8           | 56.3             | 403  | Oke et al 2014                  |
| <i>msh4Δ</i>                      | S96 x YJM789 | 6                | 214       | 341        | 35.7            | 56.8             | 118  | Oke et al 2014                  |
| <i>zip3Δ</i>                      | S96 x YJM789 | 7                | 429       | 852        | 61.3            | 121.7            | 317  | Oke et al 2014                  |
| <i>mms4Δ msh2Δ</i>                | S96 x YJM789 | 4                | 391       | 317        | 97.8            | 79.3             | 327  | Oke et al 2014                  |
| <i>P<sub>CLB2</sub>mms4</i>       | S96 x YJM789 | 3                | 321       | 260        | 107.0           | 86.7             | 273  | Oke et al 2014                  |
| <i>mms4Δ</i>                      | S96 x YJM789 | 4                | 406       | 321        | 101.5           | 80.3             | 342  | Oke et al 2014                  |
| Pooled <i>mms4</i>                | S96 x YJM789 | 7                | 727       | 581        | 103.9           | 83.0             | 616  |                                 |
| <i>sgs1Δ</i>                      | S96 x YJM789 | 11               | 1249      | 848        | 113.5           | 77.1             | 1073 | Oke et al 2014                  |
| <i>SK1-MLH3</i>                   | S96 x YJM789 | 10               | 909       | 634        | 90.9            | 63.4             | 749  | Al-Sweel et al 2017             |

**Supplementary Table 1 | Summary of whole-genome recombination data analysed in this study.**

Meioses analysed indicate the number of four-spore viable tetrads (or eight-spore viable octads for *msh2Δ* SK1 x S288c derivative strains) analysed. Spore viabilities for the SK1 x S288c strains used in this study (as from Crawford et al 2019) are as follows: Wild type 82.0%, *msh2Δ* 73.0%, *ndt80AR* 70.4%, *msh2Δ ndt80AR* 73.2%, *zip3Δ* 46.2%, *msh2Δ zip3Δ* 35.9%. Other samples analyses employ previously published datasets as indicated by Source column. COs and NCOs are total numbers analysed across all meioses of each genotype, or the average number observed per meiosis. ICDs indicates the total number of inter-crossover distances used to assess CO distributions per genotype. For S96xYJM789 two sources of wild-type data were pooled, as were *P<sub>CLB2</sub>mms4* and *mms4Δ*.

**TABLE S1**

| Genotype            | Strain | Background | Mat | Genotype                                                                                                                                    |
|---------------------|--------|------------|-----|---------------------------------------------------------------------------------------------------------------------------------------------|
| wild type           | MJ513  | SK1        | a   | <i>ho::LYS2 lys2Δ leu2Δ arg4Δ</i>                                                                                                           |
|                     | MJ600  | S288c      | α   | <i>ade8Δ</i>                                                                                                                                |
| <i>msh2Δ</i>        | MC26   | SK1        | α   | <i>ho::LYS2 lys2Δ ura3Δ arg4 leu2 msh2Δ::Kan</i>                                                                                            |
|                     | MC49   | S288c      | a   | <i>ade8Δ msh2Δ::KanMX</i>                                                                                                                   |
| <i>ndt80AR</i>      | MJ43   | SK1        | α   | <i>ho::LYS2 lys2Δ arg4Δ leu2Δ::hisG trp1Δ::hisG his4XΔ::LEU2 nuc1Δ::LEU2 PGAL1-NDT80::TRP1 ura3::pGPD1-GAL4(848)-ER::URA3</i>               |
|                     | MC42   | S288c      | a   | <i>ade8Δ ndt80Δ::KanMX</i>                                                                                                                  |
| <i>msh2Δndt80AR</i> | MC298  | SK1        | a   | <i>ho::LYS2 lys2Δ ura3Δ arg4 leu2 trp1Δ::hisG ura3Δ::PGPD1-GAL4(848)-ER::URA3 PGAL1-NDT80::TRP1 msh2Δ::Kan</i>                              |
|                     | MC300  | S288c      | α   | <i>ade8Δ ndt80Δ::KanMX msh2Δ::KanMX</i>                                                                                                     |
| <i>zip3Δ</i>        | MC322  | SK1        | α   | <i>ho::LYS2 lys2Δ ura3Δ arg4 leu2 zip3Δ::HphMX4</i>                                                                                         |
|                     | MC313  | S288c      | a   | <i>ade8Δ zip3Δ::HphMX4</i>                                                                                                                  |
| <i>msh2Δzip3Δ</i>   | MC326  | SK1        | α   | <i>ho::LYS2 lys2Δ ura3Δ arg4 leu2 msh2Δ::Kan zip3Δ::HphMX4</i>                                                                              |
|                     | MC317  | S288c      | a   | <i>ade8Δ msh2Δ::Kan zip3Δ::HphMX4</i>                                                                                                       |
| Wild type           | hLH117 | SK1        | a   | <i>ho::hisG, lys2, leu2::hisG, trp1::hisG, his3::hisG, ura3, ZIP1-GFP(at AA700)</i>                                                         |
|                     | hLH2   | S288c      | α   | <i>ade8</i>                                                                                                                                 |
| <i>msh2Δ</i>        | hLH123 | SK1        | α   | <i>ho::hisG lys2, leu2::hisG, trp1::hisG, his3::hisG, ura3, ZIP1-GFP(at AA700), msh2::KanMX</i>                                             |
|                     | MC49   | S288c      | a   | <i>ade8 msh2Δ::KanMX</i>                                                                                                                    |
| <i>ndt80AR</i>      | hLH127 | SK1        | α   | <i>ho::hisG, lys2, leu2::hisG, trp1::hisG, his3::hisG, ZIP1-GFP(at AA700), ura3::pGPD1GAL4(848)-ER::URA3, pGAL-NDT80::TRP1</i>              |
|                     | MC42   | S288c      | a   | <i>ade8Δ ndt80Δ::KanMX</i>                                                                                                                  |
| <i>msh2Δndt80AR</i> | hLH130 | SK1        | a   | <i>ho::LYS2, lys2, leu2::hisG, trp1::hisG, his3::hisG, ZIP1-GFP(at AA700), msh2::KanMX, ura3::pGPD1GAL4(848)-ER::URA3, pGAL-NDT80::TRP1</i> |
|                     | MC300  | S288c      | α   | <i>ade8Δ ndt80Δ::KanMX msh2Δ::KanMX</i>                                                                                                     |

**Supplementary Table 2 | Strain Table (S288c x SK1)**
